# Supplementary material for: TNFAIP3 is required for FGFR1 activation-promoted proliferation and tumorigenesis of premalignant DCIS.COM human mammary epithelial cells
Source: Breast Cancer Res. 2018 Aug 15;20:97. doi: 10.1186/s13058-018-1024-9 (PMC6094903; doi:10.1186/s13058-018-1024-9)
Supplement: Supplementary file 2 — Differentially expressed genes identified in DCIS-iFGFR1 cells treated with AP20187 or vehicle for 16 h. (XLS 273 kb) [file 13058_2018_1024_MOESM2_ESM.xls]

## Sheet: DCIS_com_iFGFR1_NOAP-VS-DCIS_co
	Differentially expressed genes induced by AP20187 treatment for 16 hours in DCIS-iFGFR1 cells
	For each group, 3 independent RNA samples were prepared from vehicle or AP20187-treated cells.
	The expression values are the average value of three independently assayed samples.
geneID	geneLength	Vehicle-Expression	AP 16hr-Expression	Vehicle-FPKM	AP 16hr-FPKM	log2 Ratio(AP 16hr/vehicle)	Up-Down-Regulation(AP 16hr/Vehicle)	P-value	FDR	Symbol	Description	KEGG Orthology	GO Component	GO Function	GO Process	Blast nr
978	985	0	16	0.001	1.7	10.7313	Up	1.88631e-05	0.000167248	CDA	cytidine deaminase	K01489	GO:0044444//cytoplasmic part	GO:0016814//hydrolase activity, acting on carbon-nitrogen (but not peptide) bonds, in cyclic amidines;GO:0042802//identical protein binding;GO:0046914//transition metal ion binding	GO:0006140;GO:0006206//pyrimidine nucleobase metabolic process;GO:0006216//cytidine catabolic process;GO:0007165//signal transduction;GO:0008655//pyrimidine-containing compound salvage;GO:0016049//cell growth;GO:0051260//protein homooligomerization	gi|11386157|ref|NP_001776.1|/1.2379e-81/1
100529207	3904	0	61.28	0.001	1.58	10.6257	Up	9.39814e-19	3.03294e-17	RAD51L3-RFFL	RAD51L3-RFFL readthrough	K10871	GO:0043227//membrane-bounded organelle;GO:0044424//intracellular part	GO:0003824//catalytic activity;GO:0046914//transition metal ion binding	GO:0012501//programmed cell death	gi|119600585|gb|EAW80179.1|/4.81416e-138/1
100529239	2529	0	36.75	0.001	1.47	10.5216	Up	2.30866e-11	4.44227e-10	RPS10-NUDT3	RPS10-NUDT3 readthrough	K02947	-	-	-	gi|321117084|ref|NP_001189399.1|/1.50315e-158/1
100532737	2305	0	33.23	0.001	1.47	10.5216	Up	1.77909e-10	3.11607e-09	ATP6V1G2-DDX39B	ATP6V1G2-DDX39B readthrough (non-protein coding)	K12812	GO:0016604//nuclear body;GO:0030532//small nuclear ribonucleoprotein complex;GO:0043234//protein complex	GO:0003724//RNA helicase activity;GO:0005515//protein binding;GO:0017069//snRNA binding;GO:0032559;GO:0042623//ATPase activity, coupled	GO:0000398//mRNA splicing, via spliceosome;GO:0006406//mRNA export from nucleus;GO:0009207	gi|466089434|ref|XP_004286664.1|/0/1
100287036	1205	0	14	0.001	1.2	10.2288	Up	7.35934e-05	0.000572339	LOC100287036	uncharacterized LOC100287036	-	-	-	-	gi|339275984|ref|NP_001229814.1|/1.63623e-68/1
100132287	4370	0	16.43	0.001	0.38	8.56986	Up	1.88631e-05	0.000167339	LOC100132287	uncharacterized LOC100132287	-	-	-	-	gi|194375846|dbj|BAG57267.1|/0/1
11009	1946.76	2	45	0.11	2.36	4.42321	Up	1.44897e-11	2.82454e-10	IL24	interleukin 24	K05444	GO:0044421//extracellular region part	GO:0005102//receptor binding	GO:0012501//programmed cell death	gi|5803086|ref|NP_006841.1|/2.38203e-108/1
6698	659.78	3	61.02	0.49	9.89	4.33512	Up	5.18968e-15	1.32937e-13	SPRR1A	small proline-rich protein 1A	K15601	GO:0005856//cytoskeleton	GO:0005515//protein binding	GO:0006464//cellular protein modification process;GO:0030216//keratinocyte differentiation	gi|297663532|ref|XP_002810227.1|/1.70729e-23/1
6318	1736	1.02	20.22	0.06	1.19	4.30986	Up	1.40882e-05	0.000128526	SERPINB4	serpin peptidase inhibitor, clade B (ovalbumin), member 4	K13963	GO:0044424//intracellular part	GO:0004866//endopeptidase inhibitor activity;GO:0005488//binding	GO:0002376//immune system process;GO:0006508//proteolysis;GO:0010466//negative regulation of peptidase activity	gi|28076869|ref|NP_002965.1|/0/1
5055	1922	4	52	0.22	2.76	3.64909	Up	1.09062e-11	2.14383e-10	SERPINB2	serpin peptidase inhibitor, clade B (ovalbumin), member 2	K13963	GO:0016020//membrane;GO:0043231//intracellular membrane-bounded organelle;GO:0044421//extracellular region part	GO:0004866//endopeptidase inhibitor activity	GO:0006508//proteolysis;GO:0010466//negative regulation of peptidase activity;GO:0030195//negative regulation of blood coagulation;GO:0043066//negative regulation of apoptotic process	gi|4505595|ref|NP_002566.1|/0/1
4312	2081	4	44	0.2	2.15	3.42626	Up	1.37402e-09	2.21274e-08	MMP1	matrix metallopeptidase 1 (interstitial collagenase)	K01388	GO:0031012//extracellular matrix	GO:0004175//endopeptidase activity;GO:0046914//transition metal ion binding	GO:0002376//immune system process;GO:0007599//hemostasis;GO:0019538//protein metabolic process;GO:0032963//collagen metabolic process;GO:0051704	gi|54697154|gb|AAV38949.1|/0/1
6876	1177	10	102	0.9	8.98	3.31872	Up	4.21996e-20	1.47825e-18	TAGLN	transgelin	K05730	GO:0044424//intracellular part	GO:0008092//cytoskeletal protein binding	GO:0048513//organ development	gi|397498821|ref|XP_003820173.1|/9.79353e-115/1
1293	9291.81	3	36	0.04	0.39	3.2854	Up	2.9794e-08	4.11147e-07	COL6A3	collagen, type VI, alpha 3	K06238	GO:0005578//proteinaceous extracellular matrix;GO:0030934	GO:0004857//enzyme inhibitor activity;GO:0030414//peptidase inhibitor activity	GO:0006935//chemotaxis;GO:0009987//cellular process;GO:0048513//organ development;GO:0048731	gi|55743106|ref|NP_476508.2|/0/1
4319	1777	4	38	0.24	2.19	3.18982	Up	4.81934e-08	6.49739e-07	MMP10	matrix metallopeptidase 10 (stromelysin 2)	K01396;K01394	GO:0031012//extracellular matrix	GO:0004175//endopeptidase activity;GO:0046914//transition metal ion binding	GO:0019538//protein metabolic process;GO:0032963//collagen metabolic process	gi|4505205|ref|NP_002416.1|/0/1
9590	8246	105	980	1.31	11.91	3.18453	Up	4.38782e-174	1.79835e-171	AKAP12	A kinase (PRKA) anchor protein 12	K00907	GO:0016020//membrane;GO:0043232;GO:0044444//cytoplasmic part	GO:0019899//enzyme binding	GO:0006171//cAMP biosynthetic process;GO:0006886//intracellular protein transport;GO:0007166//cell surface receptor signaling pathway;GO:0010737//protein kinase A signaling cascade	gi|68533061|dbj|BAE06085.1|/0/1
8710	1951	6	46	0.28	2.41	3.10553	Up	9.70548e-09	1.43473e-07	SERPINB7	serpin peptidase inhibitor, clade B (ovalbumin), member 7	K13964	GO:0044424//intracellular part	GO:0004866//endopeptidase inhibitor activity	GO:0006508//proteolysis;GO:0010466//negative regulation of peptidase activity	gi|4505149|ref|NP_003775.1|/0/1
9235	1008.18	4	37	0.45	3.83	3.08935	Up	8.65744e-08	1.13092e-06	IL32	interleukin 32	K08003	GO:0044421//extracellular region part	GO:0005102//receptor binding	GO:0002376//immune system process;GO:0006950//response to stress;GO:0009987//cellular process	gi|61658640|ref|NP_001012654.1|/3.67673e-103/1
8482	3336.42	35	291	1.07	8.81	3.04153	Up	3.06128e-50	2.80372e-48	SEMA7A	semaphorin 7A, GPI membrane anchor (John Milton Hagen blood group)	K06529	GO:0009986//cell surface;GO:0031224//intrinsic to membrane	GO:0004871//signal transducer activity;GO:0005488//binding	GO:0006935//chemotaxis;GO:0007166//cell surface receptor signaling pathway;GO:0010935;GO:0030307//positive regulation of cell growth;GO:0031347//regulation of defense response;GO:0043410//positive regulation of MAPK cascade;GO:0048731;GO:0048869//cellular developmental process	gi|4504237|ref|NP_003603.1|/0/1
127534	2840	10	75	0.37	2.68	2.85664	Up	2.39548e-13	5.41676e-12	GJB4	gap junction protein, beta 4, 30.3kDa	K07623	GO:0005921//gap junction;GO:0031224//intrinsic to membrane	GO:0022829//wide pore channel activity	GO:0007606//sensory perception of chemical stimulus;GO:0007635//chemosensory behavior;GO:0009987//cellular process	gi|23397464|ref|NP_694944.1|/3.46984e-151/1
6262	16365	8	59	0.05	0.36	2.848	Up	1.10216e-10	1.96828e-09	RYR2	ryanodine receptor 2 (cardiac)	K04962	GO:0005789//endoplasmic reticulum membrane;GO:0031674//I band;GO:0034703//cation channel complex;GO:0042598	GO:0004871//signal transducer activity;GO:0005218//intracellular ligand-gated calcium channel activity;GO:0046872//metal ion binding;GO:0051018//protein kinase A binding	GO:0006941//striated muscle contraction;GO:0006950//response to stress;GO:0008629;GO:0009593//detection of chemical stimulus;GO:0010038//response to metal ion;GO:0010880//regulation of release of sequestered calcium ion into cytosol by sarcoplasmic reticulum;GO:0014074//response to purine-containing compound;GO:0031667//response to nutrient levels	gi|112799847|ref|NP_001026.2|/0/1
6317	1793	44.98	320.78	2.63	18.3	2.79871	Up	1.35217e-51	1.26672e-49	SERPINB3	serpin peptidase inhibitor, clade B (ovalbumin), member 3	K13963	GO:0044424//intracellular part	GO:0004866//endopeptidase inhibitor activity;GO:0005488//binding	GO:0002376//immune system process;GO:0006508//proteolysis;GO:0010466//negative regulation of peptidase activity	gi|5902072|ref|NP_008850.1|/0/1
2921	1166	21	150	1.92	13.34	2.79658	Up	9.49504e-25	4.06427e-23	CXCL3	chemokine (C-X-C motif) ligand 3	K05505	GO:0000267//cell fraction;GO:0044421//extracellular region part	GO:0005125//cytokine activity	GO:0009607//response to biotic stimulus;GO:0030595//leukocyte chemotaxis	gi|54144650|ref|NP_002081.2|/4.16462e-37/1
3936	3808	17	119	0.46	3.15	2.77565	Up	1.01655e-19	3.48647e-18	LCP1	lymphocyte cytosolic protein 1 (L-plastin)	K10382	GO:0001726//ruffle;GO:0015629//actin cytoskeleton;GO:0044444//cytoplasmic part;GO:0044459//plasma membrane part	GO:0003779//actin binding;GO:0046872//metal ion binding	GO:0002285;GO:0006886//intracellular protein transport;GO:0006950//response to stress;GO:0007015//actin filament organization;GO:0009887//organ morphogenesis	gi|167614506|ref|NP_002289.2|/0/1
11067	2060	16	109	0.81	5.39	2.73429	Up	6.33222e-18	1.94766e-16	C10orf10	chromosome 10 open reading frame 10	-	GO:0043231//intracellular membrane-bounded organelle	-	-	gi|5901938|ref|NP_008952.1|/6.15024e-107/1
4680	2631	23	151	0.91	5.82	2.67708	Up	8.14282e-24	3.36255e-22	CEACAM6	carcinoembryonic antigen-related cell adhesion molecule 6 (non-specific cross reacting antigen)	K06499	GO:0005626//insoluble fraction;GO:0016021//integral to membrane;GO:0044459//plasma membrane part	-	GO:0007154//cell communication;GO:0007166//cell surface receptor signaling pathway;GO:0016337//cell-cell adhesion;GO:0048646//anatomical structure formation involved in morphogenesis;GO:0048870//cell motility	gi|40255013|ref|NP_002474.3|/0/1
1437	800	7	46	0.95	6.07	2.6757	Up	3.786e-08	5.18094e-07	CSF2	colony stimulating factor 2 (granulocyte-macrophage)	K05427	GO:0044421//extracellular region part	GO:0005126//cytokine receptor binding	GO:0001701//in utero embryonic development;GO:0001773//myeloid dendritic cell activation;GO:0001819//positive regulation of cytokine production;GO:0006275//regulation of DNA replication;GO:0006915//apoptotic process;GO:0008283//cell proliferation;GO:0010628//positive regulation of gene expression;GO:0010742//macrophage derived foam cell differentiation;GO:0031334//positive regulation of protein c…	gi|27437030|ref|NP_000749.2|/1.07698e-63/1
11174	7289	6	37	0.08	0.51	2.67243	Up	1.41039e-06	1.52419e-05	ADAMTS6	ADAM metallopeptidase with thrombospondin type 1 motif, 6	K08621	GO:0031012//extracellular matrix	GO:0004175//endopeptidase activity;GO:0046914//transition metal ion binding	GO:0019538//protein metabolic process	gi|64276808|ref|NP_922932.2|/0/1
7483	1240	20	129	1.71	10.76	2.65361	Up	2.36728e-20	8.41848e-19	WNT9A	wingless-type MMTV integration site family, member 9A	K01064	GO:0016020//membrane;GO:0031012//extracellular matrix	GO:0005102//receptor binding;GO:0005198//structural molecule activity;GO:0060089	GO:0000082//G1/S transition of mitotic cell cycle;GO:0000122//negative regulation of transcription from RNA polymerase II promoter;GO:0002062//chondrocyte differentiation;GO:0003002//regionalization;GO:0007154//cell communication;GO:0008283//cell proliferation;GO:0008589//regulation of smoothened signaling pathway;GO:0010466//negative regulation of peptidase activity;GO:0010941//regulation of cel…	gi|15082261|ref|NP_003386.1|/0/1
6700	692	5.41	33.98	0.86	5.23	2.6044	Up	3.49986e-06	3.5287e-05	SPRR2A	small proline-rich protein 2A	-	-	-	-	gi|403302614|ref|XP_003941950.1|/3.92795e-42/1
6699	641	32	180.98	5.5	30.25	2.45943	Up	1.24445e-25	5.58946e-24	SPRR1B	small proline-rich protein 1B	K15601	GO:0005856//cytoskeleton	GO:0005515//protein binding	GO:0006464//cellular protein modification process;GO:0030216//keratinocyte differentiation	gi|338417|gb|AAA36636.1|/9.09212e-24/1
10391	3391.14	13	71	0.4	2.12	2.40599	Up	9.69328e-11	1.74054e-09	CORO2B	coronin, actin binding protein, 2B	K13882;K13887	GO:0005856//cytoskeleton	GO:0003779//actin binding	GO:0007010//cytoskeleton organization	gi|148529011|ref|NP_006082.3|/0/1
6703	682	19.51	101	3.14	15.8	2.33109	Up	1.79703e-14	4.4235e-13	SPRR2D	small proline-rich protein 2D	-	-	-	GO:0043627//response to estrogen stimulus	gi|403302614|ref|XP_003941950.1|/2.82735e-37/1
89795	9758	37	191	0.39	1.96	2.32931	Up	1.36662e-25	6.1214e-24	NAV3	neuron navigator 3	K05699;K04437	-	-	-	gi|120953251|ref|NP_055718.4|/0/1
84659	1511	7	36	0.49	2.45	2.32193	Up	7.73716e-06	7.36175e-05	RNASE7	ribonuclease, RNase A family, 7	K01172	-	GO:0005488//binding;GO:0016892	GO:0006952//defense response;GO:0051707//response to other organism	gi|153252081|ref|NP_115961.2|/1.44226e-83/1
25907	1876	8	41	0.45	2.23	2.30905	Up	1.78556e-06	1.88977e-05	TMEM158	transmembrane protein 158 (gene/pseudogene)	-	GO:0016020//membrane	GO:0005488//binding	-	gi|332816714|ref|XP_516408.3|/6.52016e-92/1
100507127	3087	37	186	1.24	6.1	2.29847	Up	1.69867e-24	7.15887e-23	LINC00707	long intergenic non-protein coding RNA 707	-	-	-	-	gi|119606794|gb|EAW86388.1|/1.53909e-67/1
375033	4866	8	39	0.17	0.81	2.25239	Up	4.94868e-06	4.87552e-05	PEAR1	platelet endothelial aggregation receptor 1	K06252	GO:0031224//intrinsic to membrane	-	-	gi|122937343|ref|NP_001073940.1|/0/1
100528018	2463	14.75	71.02	0.62	2.93	2.24056	Up	2.98968e-10	5.08432e-09	ARL2-SNX15	ARL2-SNX15 readthrough	K07943	GO:0012506//vesicle membrane;GO:0044444//cytoplasmic part	GO:0005543//phospholipid binding;GO:0022892	GO:0009987//cellular process;GO:0015031//protein transport	gi|119594742|gb|EAW74336.1|/4.11086e-169/1
54538	3859	25	119	0.67	3.11	2.21468	Up	1.43287e-15	3.88273e-14	ROBO4	roundabout, axon guidance receptor, homolog 4 (Drosophila)	K06784	GO:0009986//cell surface;GO:0031224//intrinsic to membrane	GO:0004871//signal transducer activity	GO:0016477//cell migration;GO:0032501//multicellular organismal process;GO:0048646//anatomical structure formation involved in morphogenesis;GO:0048869//cellular developmental process	gi|37181272|gb|AAQ88450.1|/0/1
650	3150	25	117	0.82	3.76	2.19704	Up	3.84002e-15	1.00244e-13	BMP2	bone morphogenetic protein 2	K04662	GO:0031982//vesicle;GO:0032991//macromolecular complex;GO:0044421//extracellular region part;GO:0044424//intracellular part	GO:0005126//cytokine receptor binding;GO:0008047//enzyme activator activity;GO:0016564//transcription repressor activity;GO:0016616//oxidoreductase activity, acting on the CH-OH group of donors, NAD or NADP as acceptor;GO:0017002//activin-activated receptor activity;GO:0042802//identical protein binding;GO:0046983//protein dimerization activity;GO:0070696//transmembrane receptor protein serine/th…	GO:0000122//negative regulation of transcription from RNA polymerase II promoter;GO:0001837//epithelial to mesenchymal transition;GO:0001934//positive regulation of protein phosphorylation;GO:0001935//endothelial cell proliferation;GO:0003007//heart morphogenesis;GO:0003134;GO:0003171//atrioventricular valve development;GO:0006915//apoptotic process;GO:0006952//defense response;GO:0007178//transm…	gi|4557369|ref|NP_001191.1|/0/1
728932	1569	11.95	55.79	0.8	3.65	2.18982	Up	3.77668e-08	5.17251e-07	GPR89C	G protein-coupled receptor 89C	-	GO:0000139//Golgi membrane;GO:0031224//intrinsic to membrane	GO:0005244//voltage-gated ion channel activity;GO:0060089	GO:0007249//I-kappaB kinase/NF-kappaB cascade;GO:0043269//regulation of ion transport;GO:0045851//pH reduction	gi|148234741|ref|NP_001091085.1|/5.26147e-177/1
10272	2525	140	655	5.78	26.33	2.18757	Up	8.37952e-78	1.18426e-75	FSTL3	follistatin-like 3 (secreted glycoprotein)	K04661	GO:0016023//cytoplasmic membrane-bounded vesicle;GO:0044421//extracellular region part;GO:0044463	GO:0032403//protein complex binding	GO:0002762//negative regulation of myeloid leukocyte differentiation;GO:0006357//regulation of transcription from RNA polymerase II promoter;GO:0008406//gonad development;GO:0010038//response to metal ion;GO:0016337//cell-cell adhesion;GO:0030323//respiratory tube development;GO:0030509//BMP signaling pathway;GO:0032924//activin receptor signaling pathway;GO:0035270//endocrine system development;…	gi|5031701|ref|NP_005851.1|/7.24888e-137/1
204010	1144	15	70	1.4	6.35	2.18133	Up	1.42858e-09	2.29835e-08	RPSAP52	ribosomal protein SA pseudogene 52	K02998	GO:0015935//small ribosomal subunit;GO:0016020//membrane;GO:0043231//intracellular membrane-bounded organelle	GO:0005515//protein binding;GO:0043021//ribonucleoprotein complex binding	GO:0000462//maturation of SSU-rRNA from tricistronic rRNA transcript (SSU-rRNA, 5.8S rRNA, LSU-rRNA);GO:0006412//translation;GO:0019080;GO:0031016//pancreas development;GO:0034621	gi|296198405|ref|XP_002746694.1|/2.17635e-67/1
3918	5528.77	5370.06	24483.4	100.14	445.13	2.15221	Up	0	0	LAMC2	laminin, gamma 2	K06246	GO:0005626//insoluble fraction;GO:0043256//laminin complex;GO:0044444//cytoplasmic part	GO:0005539//glycosaminoglycan binding	GO:0007044//cell-substrate junction assembly;GO:0009888//tissue development	gi|157419140|ref|NP_061486.2|/0/1
23529	1849.35	37	165	2.09	9.12	2.12553	Up	5.23292e-20	1.82529e-18	CLCF1	cardiotrophin-like cytokine factor 1	K05421	GO:0044421//extracellular region part	GO:0005102//receptor binding	GO:0006915//apoptotic process;GO:0007166//cell surface receptor signaling pathway;GO:0030098//lymphocyte differentiation;GO:0042503//tyrosine phosphorylation of Stat3 protein	gi|7019351|ref|NP_037378.1|/8.31349e-132/1
3557	1802	24	101	1.37	5.73	2.06436	Up	3.22234e-12	6.64491e-11	IL1RN	interleukin 1 receptor antagonist	K05481	GO:0005815//microtubule organizing center;GO:0016020//membrane;GO:0043231//intracellular membrane-bounded organelle;GO:0044421//extracellular region part	GO:0005126//cytokine receptor binding	GO:0001959//regulation of cytokine-mediated signaling pathway;GO:0002376//immune system process;GO:0006952//defense response;GO:0030072//peptide hormone secretion;GO:0031960//response to corticosteroid stimulus;GO:0044238//primary metabolic process	gi|27894319|ref|NP_776214.1|/8.8521e-99/1
3861	1653	84.46	355.94	5.38	22.07	2.03641	Up	1.91738e-39	1.34908e-37	KRT14	keratin 14	K07604	GO:0005882//intermediate filament;GO:0031981//nuclear lumen;GO:0044444//cytoplasmic part	GO:0005198//structural molecule activity;GO:0005488//binding	GO:0007044//cell-substrate junction assembly;GO:0009314//response to radiation;GO:0009888//tissue development;GO:0010038//response to metal ion;GO:0030154//cell differentiation;GO:0045109//intermediate filament organization	gi|15431310|ref|NP_000517.2|/0/1
3303	2445	495.06	2034.65	21.11	84.52	2.00137	Up	3.68032e-212	1.88547e-209	HSPA1A	heat shock 70kDa protein 1A	K03283	GO:0016604//nuclear body;GO:0032991//macromolecular complex;GO:0044444//cytoplasmic part	GO:0019899//enzyme binding;GO:0032559	GO:0006401//RNA catabolic process;GO:0006457//protein folding;GO:0006950//response to stress;GO:0008283//cell proliferation;GO:0016049//cell growth;GO:0043066//negative regulation of apoptotic process	gi|62089222|dbj|BAD93055.1|/0/1
22989	7074	34	136	0.49	1.93	1.97775	Up	2.68418e-15	7.10896e-14	MYH15	myosin, heavy chain 15	K10352	GO:0016459//myosin complex;GO:0043292//contractile fiber	GO:0008092//cytoskeletal protein binding;GO:0017111//nucleoside-triphosphatase activity;GO:0032559	-	gi|166997692|dbj|BAA76844.3|/0/1
3598	1376	26	104	2	7.79	1.96162	Up	5.06116e-12	1.02562e-10	IL13RA2	interleukin 13 receptor, alpha 2	K05077	GO:0000267//cell fraction;GO:0031224//intrinsic to membrane;GO:0044421//extracellular region part	GO:0004888//transmembrane signaling receptor activity	GO:0007166//cell surface receptor signaling pathway	gi|10834992|ref|NP_000631.1|/0/1
144568	5192	59	235	1.17	4.55	1.95936	Up	2.83298e-25	1.24181e-23	A2ML1	alpha-2-macroglobulin-like 1	K03910	GO:0044421//extracellular region part	GO:0004857//enzyme inhibitor activity	GO:0051346//negative regulation of hydrolase activity;GO:0052547//regulation of peptidase activity	gi|74271845|ref|NP_653271.2|/0/1
5997	1375	15	59	1.15	4.42	1.94241	Up	2.79854e-07	3.40098e-06	RGS2	regulator of G-protein signaling 2, 24kDa	K07524	GO:0016020//membrane;GO:0043231//intracellular membrane-bounded organelle	GO:0005515//protein binding;GO:0008047//enzyme activator activity;GO:0060089	GO:0007186//G-protein coupled receptor signaling pathway;GO:0043087//regulation of GTPase activity;GO:0045444//fat cell differentiation;GO:0048232//male gamete generation	gi|4506517|ref|NP_002914.1|/9.6824e-108/1
207107	693	13	51	2.05	7.84	1.93523	Up	1.91194e-06	2.01442e-05	SFTA1P	surfactant associated 1, pseudogene	-	-	-	-	gi|119606765|gb|EAW86359.1|/4.6832e-11/1
3853	2450	5300.31	20436.3	225.51	847.18	1.90948	Up	0	0	KRT6A	keratin 6A	K07605	GO:0005882//intermediate filament	GO:0005198//structural molecule activity;GO:0005488//binding	GO:0008283//cell proliferation;GO:0009888//tissue development;GO:0048869//cellular developmental process	gi|5031839|ref|NP_005545.1|/0/1
94234	2338	115	439	5.13	19.09	1.89579	Up	5.25372e-44	4.20144e-42	FOXQ1	forkhead box Q1	K09410	-	GO:0003700//sequence-specific DNA binding transcription factor activity;GO:0005515//protein binding;GO:0030528//transcription regulator activity;GO:0043565//sequence-specific DNA binding	GO:0001942//hair follicle development;GO:0006357//regulation of transcription from RNA polymerase II promoter;GO:0042221//response to chemical stimulus;GO:0065009	gi|145309320|ref|NP_150285.3|/4.60922e-130/1
162514	6131.49	36	138	0.61	2.26	1.88944	Up	6.37966e-15	1.61401e-13	TRPV3	transient receptor potential cation channel, subfamily V, member 3	K04972	GO:0031224//intrinsic to membrane	GO:0005261//cation channel activity	GO:0006810//transport;GO:0009628//response to abiotic stimulus	gi|397477854|ref|XP_003810283.1|/0/1
55068	2706	12	41	0.42	1.54	1.87447	Up	7.62742e-05	0.000590945	ENOX1	ecto-NOX disulfide-thiol exchanger 1	-	GO:0016020//membrane;GO:0044421//extracellular region part	GO:0003824//catalytic activity;GO:0005488//binding	GO:0006091//generation of precursor metabolites and energy;GO:0051234//establishment of localization	gi|403286279|ref|XP_003934426.1|/0/1
126374	2204	15	56	0.71	2.59	1.86706	Up	1.1109e-06	1.22558e-05	WTIP	Wilms tumor 1 interacting protein	K12792	GO:0030529//ribonucleoprotein complex	-	GO:0035194//posttranscriptional gene silencing by RNA	gi|122937269|ref|NP_001073905.1|/2.1966e-150/1
10381	1794	175.53	656.73	10.27	37.43	1.86576	Up	9.59502e-64	1.12358e-61	TUBB3	tubulin, beta 3 class III	K07375	GO:0015630//microtubule cytoskeleton;GO:0032991//macromolecular complex;GO:0043005//neuron projection	GO:0005198//structural molecule activity;GO:0017111//nucleoside-triphosphatase activity;GO:0032561//guanyl ribonucleotide binding;GO:0042287//MHC protein binding	GO:0000087//M phase of mitotic cell cycle;GO:0006458//'de novo' protein folding;GO:0006935//chemotaxis;GO:0007051//spindle organization;GO:0009207;GO:0016477//cell migration;GO:0030154//cell differentiation;GO:0043623//cellular protein complex assembly	gi|397466576|ref|XP_003805028.1|/0/1
286887	2345	40.19	150.47	1.79	6.52	1.86491	Up	9.05908e-16	2.49185e-14	KRT6C	keratin 6C	K07605	GO:0005882//intermediate filament	GO:0005198//structural molecule activity;GO:0005488//binding	GO:0006996//organelle organization;GO:0008283//cell proliferation;GO:0009888//tissue development;GO:0048869//cellular developmental process	gi|155969697|ref|NP_775109.2|/0/1
3269	4335	31.05	115.93	0.75	2.69	1.84264	Up	2.72306e-12	5.67962e-11	HRH1	histamine receptor H1	K04149	GO:0005626//insoluble fraction;GO:0016021//integral to membrane;GO:0031981//nuclear lumen	GO:0008227//G-protein coupled amine receptor activity;GO:0043176//amine binding	GO:0006694//steroid biosynthetic process;GO:0006952//defense response;GO:0007186//G-protein coupled receptor signaling pathway;GO:0007267//cell-cell signaling;GO:0009628//response to abiotic stimulus;GO:0019229//regulation of vasoconstriction;GO:0031328//positive regulation of cellular biosynthetic process	gi|4504491|ref|NP_000852.1|/0/1
6549	5446	10	37	0.19	0.68	1.83954	Up	8.80474e-05	0.000670436	SLC9A2	solute carrier family 9, subfamily A (NHE2, cation proton antiporter 2), member 2	K14722	GO:0031224//intrinsic to membrane	GO:0005451//monovalent cation:hydrogen antiporter activity	GO:0030001//metal ion transport;GO:0033036;GO:0055067	gi|426336657|ref|XP_004031583.1|/0/1
8061	1668	515	1877	32.48	115.3	1.82777	Up	9.00142e-174	3.59925e-171	FOSL1	FOS-like antigen 1	K04502	GO:0016020//membrane;GO:0042598;GO:0043231//intracellular membrane-bounded organelle;GO:0044444//cytoplasmic part	GO:0005488//binding;GO:0030528//transcription regulator activity	GO:0000302//response to reactive oxygen species;GO:0006915//apoptotic process;GO:0006952//defense response;GO:0007611//learning or memory;GO:0008283//cell proliferation;GO:0009605//response to external stimulus;GO:0009628//response to abiotic stimulus;GO:0022414//reproductive process;GO:0045897//positive regulation of transcription during mitosis;GO:0051384//response to glucocorticoid stimulus;GO…	gi|4885243|ref|NP_005429.1|/1.63737e-83/1
3624	2175	92	329	4.42	15.4	1.80081	Up	2.95072e-31	1.60179e-29	INHBA	inhibin, beta A	K04667	GO:0043511;GO:0048180	GO:0005102//receptor binding;GO:0030528//transcription regulator activity;GO:0046983//protein dimerization activity;GO:0060089	GO:0001553//luteinization;GO:0001704//formation of primary germ layer;GO:0002762//negative regulation of myeloid leukocyte differentiation;GO:0006357//regulation of transcription from RNA polymerase II promoter;GO:0006950//response to stress;GO:0008283//cell proliferation;GO:0008544//epidermis development;GO:0009887//organ morphogenesis;GO:0012502//induction of programmed cell death;GO:0016049//c…	gi|4504699|ref|NP_002183.1|/0/1
116211	1076.73	12	45	1.27	4.35	1.77619	Up	1.2639e-05	0.000116603	TM4SF19	transmembrane 4 L six family member 19	-	-	-	-	gi|325974477|ref|NP_001191827.1|/1.84639e-56/1
8728	6506	150	525	2.37	8.1	1.77303	Up	8.69994e-48	7.3519e-46	ADAM19	ADAM metallopeptidase domain 19	K08608	GO:0031224//intrinsic to membrane	GO:0004175//endopeptidase activity;GO:0019904//protein domain specific binding;GO:0046914//transition metal ion binding	GO:0019538//protein metabolic process	gi|15451844|ref|NP_150377.1|/0/1
634	3454.35	529	1839	15.87	53.78	1.76077	Up	1.10667e-161	3.77973e-159	CEACAM1	carcinoembryonic antigen-related cell adhesion molecule 1 (biliary glycoprotein)	K06499	GO:0005626//insoluble fraction;GO:0016021//integral to membrane	-	GO:0007166//cell surface receptor signaling pathway;GO:0016337//cell-cell adhesion;GO:0048646//anatomical structure formation involved in morphogenesis;GO:0048870//cell motility	gi|329112547|ref|NP_001192273.1|/0/1
638	966	31	108	3.45	11.69	1.76061	Up	5.98624e-11	1.08922e-09	BIK	BCL2-interacting killer (apoptosis-inducing)	-	GO:0031224//intrinsic to membrane;GO:0031967	GO:0019904//protein domain specific binding;GO:0046983//protein dimerization activity	GO:0001836//release of cytochrome c from mitochondria;GO:0008406//gonad development;GO:0012502//induction of programmed cell death;GO:0032461//positive regulation of protein oligomerization;GO:0048232//male gamete generation	gi|4502411|ref|NP_001188.1|/5.1234e-72/1
53947	2106	19	65	0.94	3.14	1.74003	Up	5.5003e-07	6.39971e-06	A4GALT	alpha 1,4-galactosyltransferase	K01988	GO:0005626//insoluble fraction;GO:0031228//intrinsic to Golgi membrane	GO:0035250//UDP-galactosyltransferase activity	GO:0006687//glycosphingolipid metabolic process;GO:0016044//cellular membrane organization	gi|45775247|gb|AAS77221.1|/0/1
1992	2678.95	407.27	1375.24	15.83	52.06	1.71751	Up	1.79412e-117	4.52504e-115	SERPINB1	serpin peptidase inhibitor, clade B (ovalbumin), member 1	K13963	GO:0044421//extracellular region part;GO:0044424//intracellular part	GO:0004866//endopeptidase inhibitor activity	GO:0006508//proteolysis;GO:0010466//negative regulation of peptidase activity	gi|13489087|ref|NP_109591.1|/0/1
9047	1595.63	16	56	1.1	3.6	1.71049	Up	2.56088e-06	2.63382e-05	SH2D2A	SH2 domain containing 2A	K08273	GO:0000267//cell fraction;GO:0044424//intracellular part	GO:0019904//protein domain specific binding;GO:0030674//protein binding, bridging	GO:0023052//signaling;GO:0032501//multicellular organismal process;GO:0048646//anatomical structure formation involved in morphogenesis;GO:0048869//cellular developmental process	gi|239787758|ref|NP_001154914.1|/0/1
3553	1498	25	84	1.76	5.76	1.71049	Up	1.66538e-08	2.38032e-07	IL1B	interleukin 1, beta	K04519	GO:0016023//cytoplasmic membrane-bounded vesicle;GO:0044421//extracellular region part	GO:0005126//cytokine receptor binding	GO:0001660//fever generation;GO:0002237//response to molecule of bacterial origin;GO:0002437//inflammatory response to antigenic stimulus;GO:0002456//T cell mediated immunity;GO:0007088//regulation of mitosis;GO:0007166//cell surface receptor signaling pathway;GO:0007249//I-kappaB kinase/NF-kappaB cascade;GO:0007292//female gamete generation;GO:0007611//learning or memory;GO:0009612//response to …	gi|119594013|gb|EAW73607.1|/6.28553e-148/1
2124	2009	22	74	1.15	3.76	1.7091	Up	1.18384e-07	1.51505e-06	EVI2B	ecotropic viral integration site 2B	K10955	GO:0016021//integral to membrane;GO:0044424//intracellular part	-	-	gi|297700477|ref|XP_002827273.1|/0/1
9052	2856	1172	3891	42.66	138	1.69371	Up	0	0	GPRC5A	G protein-coupled receptor, family C, group 5, member A	K08468	GO:0012506//vesicle membrane;GO:0016021//integral to membrane;GO:0043231//intracellular membrane-bounded organelle	GO:0004888//transmembrane signaling receptor activity	GO:0007166//cell surface receptor signaling pathway	gi|4506403|ref|NP_003970.1|/0/1
493	8759.82	558	1851	6.55	21.18	1.69314	Up	4.01348e-154	1.29014e-151	ATP2B4	ATPase, Ca++ transporting, plasma membrane 4	K05850	GO:0016021//integral to membrane	GO:0005515//protein binding;GO:0019829//cation-transporting ATPase activity;GO:0032559;GO:0043169//cation binding;GO:0046873//metal ion transmembrane transporter activity	GO:0001775//cell activation;GO:0006816//calcium ion transport;GO:0007599//hemostasis;GO:0009206;GO:0048856//anatomical structure development	gi|48255959|ref|NP_001001396.1|/0/1
200150	3305	38	127	1.2	3.88	1.69302	Up	4.1525e-12	8.50951e-11	PLD5	phospholipase D family, member 5	-	GO:0031224//intrinsic to membrane	-	-	gi|431916225|gb|ELK16472.1|/0/1
8828	5664.62	102	318	1.75	5.64	1.68834	Up	6.30034e-26	2.8691e-24	NRP2	neuropilin 2	K06819	GO:0005626//insoluble fraction;GO:0031224//intrinsic to membrane;GO:0043005//neuron projection	GO:0004714//transmembrane receptor protein tyrosine kinase activity;GO:0005488//binding	GO:0001667//ameboidal cell migration;GO:0006935//chemotaxis;GO:0007169//transmembrane receptor protein tyrosine kinase signaling pathway;GO:0048513//organ development;GO:0048731;GO:0048869//cellular developmental process	gi|41872572|ref|NP_958436.1|/0/1
4907	4015.15	812	2673	20.84	67.13	1.6876	Up	1.17907e-219	6.44324e-217	NT5E	5'-nucleotidase, ecto (CD73)	K01081	GO:0005626//insoluble fraction;GO:0031224//intrinsic to membrane;GO:0044424//intracellular part	GO:0005506//iron ion binding;GO:0008252//nucleotidase activity	GO:0006213//pyrimidine nucleoside metabolic process;GO:0009112;GO:0009169;GO:0031348//negative regulation of defense response;GO:0044260;GO:0046085//adenosine metabolic process	gi|4505467|ref|NP_002517.1|/0/1
5155	2690.34	52	162	1.91	6.11	1.6776	Up	6.3605e-14	1.50685e-12	PDGFB	platelet-derived growth factor beta polypeptide	K04359	GO:0012505//endomembrane system;GO:0031091//platelet alpha granule;GO:0044432//endoplasmic reticulum part	GO:0019838//growth factor binding;GO:0042802//identical protein binding;GO:0043498//cell surface binding;GO:0046983//protein dimerization activity;GO:0070851//growth factor receptor binding	GO:0001701//in utero embryonic development;GO:0001934//positive regulation of protein phosphorylation;GO:0001935//endothelial cell proliferation;GO:0003093//regulation of glomerular filtration;GO:0006275//regulation of DNA replication;GO:0006661//phosphatidylinositol biosynthetic process;GO:0006887//exocytosis;GO:0007010//cytoskeleton organization;GO:0007169//transmembrane receptor protein tyrosi…	gi|4505681|ref|NP_002599.1|/1.56971e-129/1
3786	10717	22	72	0.21	0.67	1.67377	Up	2.78238e-07	3.38637e-06	KCNQ3	potassium voltage-gated channel, KQT-like subfamily, member 3	K04928	GO:0005887//integral to plasma membrane	GO:0005267//potassium channel activity	GO:0006935//chemotaxis;GO:0007267//cell-cell signaling;GO:0030001//metal ion transport;GO:0034220//ion transmembrane transport	gi|4758630|ref|NP_004510.1|/0/1
51332	11739	27	89	0.24	0.76	1.66297	Up	9.1978e-09	1.36214e-07	SPTBN5	spectrin, beta, non-erythrocytic 5	K06115	GO:0030864//cortical actin cytoskeleton	GO:0003779//actin binding;GO:0046983//protein dimerization activity	GO:0006935//chemotaxis;GO:0030835//negative regulation of actin filament depolymerization	gi|119612929|gb|EAW92523.1|/0/1
3575	4617	127	410	2.84	8.94	1.65438	Up	2.17146e-34	1.29451e-32	IL7R	interleukin 7 receptor	K05072	GO:0009986//cell surface;GO:0031224//intrinsic to membrane	GO:0004896//cytokine receptor activity	GO:0001911;GO:0002440;GO:0006310//DNA recombination;GO:0007166//cell surface receptor signaling pathway;GO:0032535//regulation of cellular component size;GO:0032989;GO:0033077//T cell differentiation in thymus;GO:0040007//growth;GO:0042113//B cell activation;GO:0042592//homeostatic process	gi|28610151|ref|NP_002176.2|/0/1
51700	1348	143	460	11.23	35.19	1.64781	Up	3.20316e-38	2.17895e-36	CYB5R2	cytochrome b5 reductase 2	K00326	GO:0000267//cell fraction;GO:0043231//intracellular membrane-bounded organelle	GO:0016653//oxidoreductase activity, acting on NAD(P)H, heme protein as acceptor	GO:0006694//steroid biosynthetic process	gi|119589057|gb|EAW68651.1|/1.47842e-161/1
7424	2076	103	331	5.19	16.25	1.64663	Up	6.40558e-28	3.1069e-26	VEGFC	vascular endothelial growth factor C	K05449	GO:0031091//platelet alpha granule;GO:0044421//extracellular region part	GO:0005172//vascular endothelial growth factor receptor binding	GO:0001775//cell activation;GO:0001934//positive regulation of protein phosphorylation;GO:0002009//morphogenesis of an epithelium;GO:0002690//positive regulation of leukocyte chemotaxis;GO:0006887//exocytosis;GO:0007169//transmembrane receptor protein tyrosine kinase signaling pathway;GO:0007405//neuroblast proliferation;GO:0007599//hemostasis;GO:0008217//regulation of blood pressure;GO:0008284//…	gi|441620202|ref|XP_004088647.1|/0/1
5744	1622.65	28	89	1.8	5.62	1.64257	Up	1.94401e-08	2.74742e-07	PTHLH	parathyroid hormone-like hormone	-	GO:0043231//intracellular membrane-bounded organelle;GO:0044421//extracellular region part	GO:0005102//receptor binding	GO:0001649//osteoblast differentiation;GO:0002062//chondrocyte differentiation;GO:0006171//cAMP biosynthetic process;GO:0007154//cell communication;GO:0007188//adenylate cyclase-modulating G-protein coupled receptor signaling pathway;GO:0008283//cell proliferation;GO:0022414//reproductive process;GO:0043392//negative regulation of DNA binding;GO:0048646//anatomical structure formation involved in…	gi|4506269|ref|NP_002811.1|/5.213e-65/1
80000	6052	30	96	0.51	1.59	1.64046	Up	4.60488e-09	7.00301e-08	GREB1L	growth regulation by estrogen in breast cancer-like	K09390	GO:0031224//intrinsic to membrane	-	-	gi|219282747|ref|NP_001136438.1|/0/1
100287314	1895	62	196.33	3.43	10.58	1.62506	Up	7.89906e-17	2.30833e-15	LOC100287314	uncharacterized LOC100287314	K14693;K11447;K00939	-	-	-	gi|158260771|dbj|BAF82563.1|/1.60049e-29/1
25758	11640	24	74	0.21	0.64	1.60768	Up	5.26468e-07	6.14738e-06	KIAA1549L	KIAA1549-like	K10955;K13908;K15259	GO:0031224//intrinsic to membrane	-	-	gi|302129637|ref|NP_036326.2|/0/1
57214	7080	29	90	0.42	1.28	1.60768	Up	2.65838e-08	3.68398e-07	KIAA1199	KIAA1199	K09666	GO:0044424//intracellular part	-	-	gi|426380059|ref|XP_004056701.1|/0/1
29126	3691	16	50	0.45	1.37	1.60618	Up	3.38264e-05	0.000284093	CD274	CD274 molecule	K06745	GO:0009986//cell surface;GO:0031224//intrinsic to membrane	GO:0004871//signal transducer activity;GO:0005488//binding	GO:0007165//signal transduction;GO:0031294;GO:0042098//T cell proliferation	gi|7661534|ref|NP_054862.1|/3.32003e-165/1
3576	1718	423	1318	25.88	78.54	1.60159	Up	4.10666e-102	8.41557e-100	IL8	interleukin 8	K10030	GO:0044421//extracellular region part	GO:0005125//cytokine activity;GO:0045236//CXCR chemokine receptor binding	GO:0002274;GO:0002690//positive regulation of leukocyte chemotaxis;GO:0006952//defense response;GO:0007155//cell adhesion;GO:0007166//cell surface receptor signaling pathway;GO:0008283//cell proliferation;GO:0019932//second-messenger-mediated signaling;GO:0022402//cell cycle process;GO:0032496//response to lipopolysaccharide;GO:0045069//regulation of viral genome replication;GO:0048565//digestive…	gi|33959|emb|CAA77745.1|/2.57618e-39/1
8796	3206.57	88	277	2.88	8.74	1.60156	Up	4.7715e-23	1.91725e-21	SCEL	sciellin	K06084	GO:0005856//cytoskeleton	GO:0046914//transition metal ion binding	GO:0009913//epidermal cell differentiation	gi|238908501|ref|NP_001154178.1|/0/1
11186	1770	35	111	2.13	6.42	1.59172	Up	3.58668e-10	6.05562e-09	RASSF1	Ras association (RalGDS/AF-6) domain family member 1	K09850	GO:0005819//spindle;GO:0043231//intracellular membrane-bounded organelle	GO:0005515//protein binding;GO:0046914//transition metal ion binding	GO:0007050//cell cycle arrest;GO:0007264//small GTPase mediated signal transduction;GO:0016567//protein ubiquitination;GO:0031647//regulation of protein stability;GO:0033554//cellular response to stress	gi|25777684|ref|NP_733832.1|/1.73762e-133/1
3914	4096.36	4140	12633	104.39	310.89	1.57442	Up	0	0	LAMB3	laminin, beta 3	K06244	GO:0043256//laminin complex	GO:0005515//protein binding	GO:0007044//cell-substrate junction assembly;GO:0009888//tissue development;GO:0045444//fat cell differentiation	gi|62868215|ref|NP_000219.2|/0/1
91624	3251.85	33	101	1.07	3.14	1.55315	Up	5.13868e-09	7.78591e-08	NEXN	nexilin (F actin binding protein)	K00907	GO:0030017//sarcomere;GO:0030054//cell junction	GO:0003779//actin binding;GO:0005198//structural molecule activity	GO:0016477//cell migration;GO:0033043//regulation of organelle organization	gi|288856248|ref|NP_001165780.1|/0/1
3304	2551	723.94	2180.35	29.56	86.74	1.55305	Up	1.41116e-160	4.72133e-158	HSPA1B	heat shock 70kDa protein 1B	K03283	GO:0016604//nuclear body;GO:0032991//macromolecular complex;GO:0044444//cytoplasmic part	GO:0019899//enzyme binding;GO:0032559	GO:0006259//DNA metabolic process;GO:0006401//RNA catabolic process;GO:0006457//protein folding;GO:0006950//response to stress;GO:0008283//cell proliferation;GO:0010466//negative regulation of peptidase activity;GO:0016049//cell growth;GO:0043066//negative regulation of apoptotic process	gi|62089222|dbj|BAD93055.1|/0/1
9021	2746	23	69	0.87	2.55	1.55141	Up	1.99715e-06	2.10015e-05	SOCS3	suppressor of cytokine signaling 3	K04696	GO:0044444//cytoplasmic part	GO:0005488//binding;GO:0019887//protein kinase regulator activity	GO:0001568//blood vessel development;GO:0001959//regulation of cytokine-mediated signaling pathway;GO:0002237//response to molecule of bacterial origin;GO:0006468//protein phosphorylation;GO:0006950//response to stress;GO:0007243//intracellular protein kinase cascade;GO:0009887//organ morphogenesis;GO:0009968//negative regulation of signal transduction;GO:0010212//response to ionizing radiation;G…	gi|402901247|ref|XP_003913566.1|/4.12126e-125/1
5054	3207	522	1566	16.89	49.38	1.54776	Up	4.1162e-115	1.02244e-112	SERPINE1	serpin peptidase inhibitor, clade E (nexin, plasminogen activator inhibitor type 1), member 1	K03982	GO:0000267//cell fraction;GO:0016020//membrane;GO:0031091//platelet alpha granule;GO:0044421//extracellular region part	GO:0004866//endopeptidase inhibitor activity;GO:0019899//enzyme binding	GO:0001775//cell activation;GO:0001819//positive regulation of cytokine production;GO:0001953//negative regulation of cell-matrix adhesion;GO:0002540//leukotriene production involved in inflammatory response;GO:0002548//monocyte chemotaxis;GO:0006887//exocytosis;GO:0006915//apoptotic process;GO:0006979//response to oxidative stress;GO:0007569//cell aging;GO:0008283//cell proliferation;GO:0009629/…	gi|221041958|dbj|BAH12656.1|/0/1
27111	1595	75.79	226.96	5	14.6	1.54597	Up	4.21226e-18	1.30787e-16	SDCBP2	syndecan binding protein (syntenin) 2	K04531	GO:0016020//membrane;GO:0044424//intracellular part	GO:0042802//identical protein binding;GO:0046983//protein dimerization activity	GO:0006810//transport;GO:0007165//signal transduction;GO:0048731	gi|134152672|ref|NP_536737.3|/4.94972e-120/1
27076	1745	419	1238	25.22	72.6	1.5254	Up	1.55687e-89	2.71525e-87	LYPD3	LY6/PLAUR domain containing 3	K03985	GO:0031225//anchored to membrane	GO:0005515//protein binding	GO:0031589//cell-substrate adhesion	gi|93004088|ref|NP_055215.2|/6.66792e-168/1
3909	5638.49	4322	12634	78.85	225.19	1.51396	Up	0	0	LAMA3	laminin, alpha 3	K06240	GO:0043256//laminin complex	GO:0005515//protein binding	GO:0007044//cell-substrate junction assembly;GO:0007155//cell adhesion;GO:0009888//tissue development;GO:0016477//cell migration;GO:2000026//regulation of multicellular organismal development	gi|38045910|ref|NP_937762.1|/0/1
7128	4719.59	75	221	1.65	4.71	1.51326	Up	3.03886e-17	9.05801e-16	TNFAIP3	tumor necrosis factor, alpha-induced protein 3	K11859	GO:0005815//microtubule organizing center;GO:0043231//intracellular membrane-bounded organelle	GO:0003676//nucleic acid binding;GO:0004869//cysteine-type endopeptidase inhibitor activity;GO:0016790//thiolester hydrolase activity;GO:0019783//small conjugating protein-specific protease activity;GO:0019787//small conjugating protein ligase activity;GO:0019899//enzyme binding;GO:0032182//small conjugating protein binding;GO:0046914//transition metal ion binding	GO:0000209//protein polyubiquitination;GO:0001782//B cell homeostasis;GO:0001818//negative regulation of cytokine production;GO:0002158//osteoclast proliferation;GO:0002467//germinal center formation;GO:0002507//tolerance induction;GO:0006461//protein complex assembly;GO:0007249//I-kappaB kinase/NF-kappaB cascade;GO:0008285//negative regulation of cell proliferation;GO:0009896;GO:0010466//negativ…	gi|397515090|ref|XP_003827793.1|/0/1
3897	5019	155	453	3.19	9.08	1.50914	Up	2.31702e-33	1.33281e-31	L1CAM	L1 cell adhesion molecule	K06550	GO:0005626//insoluble fraction;GO:0009986//cell surface;GO:0031224//intrinsic to membrane;GO:0033267//axon part	GO:0005102//receptor binding;GO:0019904//protein domain specific binding;GO:0048029//monosaccharide binding	GO:0002376//immune system process;GO:0006935//chemotaxis;GO:0007599//hemostasis;GO:0009967//positive regulation of signal transduction;GO:0016337//cell-cell adhesion;GO:0030030//cell projection organization;GO:0048731;GO:0048869//cellular developmental process	gi|4557707|ref|NP_000416.1|/0/1
1893	2161	20	58	0.97	2.73	1.49284	Up	2.12732e-05	0.000186499	ECM1	extracellular matrix protein 1	-	GO:0031012//extracellular matrix	GO:0019899//enzyme binding;GO:0060089	GO:0001935//endothelial cell proliferation;GO:0007249//I-kappaB kinase/NF-kappaB cascade;GO:0009888//tissue development;GO:0030279//negative regulation of ossification;GO:0045765//regulation of angiogenesis;GO:0051346//negative regulation of hydrolase activity	gi|322302700|ref|NP_001189787.1|/0/1
100302736	3627	60.4	173.64	1.73	4.83	1.48125	Up	1.93319e-13	4.42018e-12	TMED7-TICAM2	TMED7-TICAM2 readthrough	K14825;K05409	GO:0043231//intracellular membrane-bounded organelle;GO:0044425//membrane part	GO:0004872//receptor activity;GO:0005488//binding	GO:0001816//cytokine production;GO:0002224//toll-like receptor signaling pathway;GO:0007166//cell surface receptor signaling pathway;GO:0007249//I-kappaB kinase/NF-kappaB cascade	gi|256985100|ref|NP_001157940.1|/0/1
79413	2226	30	86	1.41	3.93	1.47883	Up	2.6318e-07	3.21743e-06	ZBED2	zinc finger, BED-type containing 2	-	-	GO:0003676//nucleic acid binding;GO:0043169//cation binding	-	gi|56790947|ref|NP_078784.2|/7.50223e-98/1
5794	3935	19	54	0.5	1.38	1.46467	Up	5.33846e-05	0.000429434	PTPRH	protein tyrosine phosphatase, receptor type, H	K01104	GO:0016021//integral to membrane;GO:0044424//intracellular part	GO:0004725//protein tyrosine phosphatase activity;GO:0005488//binding	GO:0006464//cellular protein modification process;GO:0012501//programmed cell death	gi|241896926|ref|NP_001154912.1|/0/1
221584	4066	48	135	1.22	3.35	1.45728	Up	1.84241e-10	3.21666e-09	ZSCAN12P1	zinc finger and SCAN domain containing 12 pseudogene 1	K09230	GO:0005622//intracellular	GO:0046872//metal ion binding	GO:0006351//transcription, DNA-dependent	gi|119623537|gb|EAX03132.1|/6.75125e-50/1
316	4949	58	163	1.21	3.31	1.45182	Up	2.48388e-12	5.20725e-11	AOX1	aldehyde oxidase 1	K00157	GO:0044424//intracellular part	GO:0000166//nucleotide binding;GO:0016623;GO:0016726//oxidoreductase activity, acting on CH or CH2 groups, NAD or NADP as acceptor;GO:0046914//transition metal ion binding;GO:0050662//coenzyme binding;GO:0051536//iron-sulfur cluster binding	GO:0006952//defense response;GO:0008152//metabolic process	gi|71773480|ref|NP_001150.3|/0/1
400745	3705	24	67	0.67	1.83	1.44961	Up	8.61982e-06	8.14017e-05	SH2D5	SH2 domain containing 5	K10394	-	-	-	gi|395731036|ref|XP_002811393.2|/0/1
57458	5867	25	70	0.44	1.2	1.44746	Up	5.13406e-06	5.05209e-05	TMCC3	transmembrane and coiled-coil domain family 3	-	GO:0031224//intrinsic to membrane	-	-	gi|188497714|ref|NP_065749.2|/0/1
7099	5718.07	86	241	1.57	4.24	1.4333	Up	1.78538e-17	5.37055e-16	TLR4	toll-like receptor 4	K10160	GO:0009986//cell surface;GO:0016021//integral to membrane;GO:0043235//receptor complex;GO:0044444//cytoplasmic part	GO:0001530//lipopolysaccharide binding;GO:0004872//receptor activity;GO:0019900//kinase binding	GO:0001774//microglial cell activation;GO:0001818//negative regulation of cytokine production;GO:0001934//positive regulation of protein phosphorylation;GO:0002224//toll-like receptor signaling pathway;GO:0002532//production of molecular mediator involved in inflammatory response;GO:0002762//negative regulation of myeloid leukocyte differentiation;GO:0006915//apoptotic process;GO:0006941//striate…	gi|19924149|ref|NP_612564.1|/0/1
5328	2404.51	192	530	8.3	22.39	1.43167	Up	8.77754e-36	5.53458e-34	PLAU	plasminogen activator, urokinase	K01348	GO:0016020//membrane;GO:0044421//extracellular region part	GO:0004175//endopeptidase activity	GO:0001952//regulation of cell-matrix adhesion;GO:0008283//cell proliferation;GO:0009966//regulation of signal transduction;GO:0014909//smooth muscle cell migration;GO:0019538//protein metabolic process;GO:0030195//negative regulation of blood coagulation;GO:0042221//response to chemical stimulus	gi|4505863|ref|NP_002649.1|/0/1
147372	6276	21.09	59	0.35	0.94	1.42531	Up	2.77956e-05	0.00023721	CCBE1	collagen and calcium binding EGF domains 1	K06702;K00939	-	-	GO:0001525//angiogenesis;GO:0001945//lymph vessel development	gi|397514173|ref|XP_003827370.1|/0/1
7280	1621	72.66	199.48	4.72	12.62	1.41885	Up	2.05494e-14	5.03568e-13	TUBB2A	tubulin, beta 2A class IIa	K07375	GO:0015630//microtubule cytoskeleton;GO:0032991//macromolecular complex	GO:0017111//nucleoside-triphosphatase activity;GO:0032561//guanyl ribonucleotide binding	GO:0000087//M phase of mitotic cell cycle;GO:0006458//'de novo' protein folding;GO:0007017//microtubule-based process;GO:0009207;GO:0016477//cell migration;GO:0030154//cell differentiation;GO:0043623//cellular protein complex assembly	gi|471412143|ref|XP_004387621.1|/0/1
50515	5762.23	85	231	1.52	4.03	1.40671	Up	4.08904e-16	1.14984e-14	CHST11	carbohydrate (chondroitin 4) sulfotransferase 11	K01017	GO:0012505//endomembrane system;GO:0031224//intrinsic to membrane;GO:0043231//intracellular membrane-bounded organelle	GO:0034481//chondroitin sulfotransferase activity	GO:0002062//chondrocyte differentiation;GO:0006024//glycosaminoglycan biosynthetic process;GO:0006790//sulfur compound metabolic process;GO:0006915//apoptotic process;GO:0007179//transforming growth factor beta receptor signaling pathway;GO:0008283//cell proliferation;GO:0030326//embryonic limb morphogenesis;GO:0033036;GO:0040007//growth;GO:0048562//embryonic organ morphogenesis	gi|8923758|ref|NP_060883.1|/0/1
8877	1897.78	74	205	4.17	11.03	1.40331	Up	7.50346e-15	1.88668e-13	SPHK1	sphingosine kinase 1	K04718	GO:0005626//insoluble fraction;GO:0016020//membrane;GO:0044444//cytoplasmic part	GO:0001727//lipid kinase activity;GO:0003676//nucleic acid binding;GO:0019903//protein phosphatase binding;GO:0032559;GO:0046872//metal ion binding	GO:0001959//regulation of cytokine-mediated signaling pathway;GO:0006066//alcohol metabolic process;GO:0006458//'de novo' protein folding;GO:0006939//smooth muscle contraction;GO:0007186//G-protein coupled receptor signaling pathway;GO:0007346//regulation of mitotic cell cycle;GO:0008284//positive regulation of cell proliferation;GO:0016049//cell growth;GO:0016477//cell migration;GO:0016567//prot…	gi|332260168|ref|XP_003279157.1|/0/1
5266	579	815	2207	156.34	411.69	1.39687	Up	2.62218e-139	7.67643e-137	PI3	peptidase inhibitor 3, skin-derived	-	GO:0031012//extracellular matrix	GO:0004866//endopeptidase inhibitor activity	GO:0007618//mating;GO:0010466//negative regulation of peptidase activity	gi|4505787|ref|NP_002629.1|/3.55105e-63/1
390928	2962	19.53	53	0.69	1.81	1.39132	Up	7.9061e-05	0.000609082	PAPL	iron/zinc purple acid phosphatase-like protein	K11447;K01113;K00939	-	GO:0016791//phosphatase activity;GO:0043169//cation binding	-	gi|228008321|ref|NP_001004318.2|/0/1
55785	9288	243	652	2.69	7.03	1.38592	Up	7.83428e-42	5.89152e-40	FGD6	FYVE, RhoGEF and PH domain containing 6	K05724	GO:0031252//cell leading edge;GO:0043231//intracellular membrane-bounded organelle;GO:0043232	GO:0005088//Ras guanyl-nucleotide exchange factor activity;GO:0043169//cation binding;GO:0051020//GTPase binding	GO:0007010//cytoskeleton organization;GO:0030035//microspike assembly;GO:0032319//regulation of Rho GTPase activity;GO:0065008	gi|154240686|ref|NP_060821.3|/0/1
1890	1736.9	25	66.75	1.52	3.93	1.37046	Up	2.35566e-05	0.000203685	TYMP	thymidine phosphorylase	K00758	GO:0044444//cytoplasmic part	GO:0016758//transferase activity, transferring hexosyl groups;GO:0016763//transferase activity, transferring pentosyl groups;GO:0070851//growth factor receptor binding	GO:0006213//pyrimidine nucleoside metabolic process;GO:0006259//DNA metabolic process;GO:0007005//mitochondrion organization;GO:0008655//pyrimidine-containing compound salvage;GO:0009112;GO:0009117//nucleotide metabolic process;GO:0032501//multicellular organismal process;GO:0042221//response to chemical stimulus;GO:0048646//anatomical structure formation involved in morphogenesis;GO:0048869//cel…	gi|4503445|ref|NP_001944.1|/0/1
387914	2889	23	61	0.83	2.14	1.36643	Up	4.55212e-05	0.000371836	SHISA2	shisa homolog 2 (Xenopus laevis)	K09228;K11447;K00939;K00591	GO:0031090//organelle membrane;GO:0031224//intrinsic to membrane;GO:0043231//intracellular membrane-bounded organelle	-	GO:0032501//multicellular organismal process	gi|56090523|ref|NP_001007539.1|/2.22698e-137/1
90637	907	21	55	2.49	6.36	1.35288	Up	0.000128432	0.000941643	ZFAND2A	zinc finger, AN1-type domain 2A	-	GO:0043231//intracellular membrane-bounded organelle	GO:0046914//transition metal ion binding	-	gi|119607603|gb|EAW87197.1|/3.94823e-105/1
22943	1815	709	1850	40.99	104.2	1.34601	Up	1.91079e-110	4.29117e-108	DKK1	dickkopf 1 homolog (Xenopus laevis)	K02165	GO:0016020//membrane;GO:0044421//extracellular region part	GO:0060089;GO:0070325//lipoprotein particle receptor binding	GO:0000122//negative regulation of transcription from RNA polymerase II promoter;GO:0000902//cell morphogenesis;GO:0001756//somitogenesis;GO:0001933//negative regulation of protein phosphorylation;GO:0003129;GO:0006461//protein complex assembly;GO:0007420//brain development;GO:0009888//tissue development;GO:0030178//negative regulation of Wnt receptor signaling pathway;GO:0030509//BMP signaling p…	gi|7110719|ref|NP_036374.1|/5.02117e-150/1
4277	2497	30	78	1.25	3.17	1.34255	Up	5.4985e-06	5.36562e-05	MICB	MHC class I polypeptide-related sequence B	K07985	GO:0016021//integral to membrane;GO:0042611	GO:0005102//receptor binding	GO:0002757//immune response-activating signal transduction;GO:0008219//cell death;GO:0033189//response to vitamin A;GO:0042110//T cell activation;GO:0050687//negative regulation of defense response to virus	gi|167857788|ref|NP_005922.2|/0/1
55901	3317.59	29.64	78.14	0.94	2.38	1.34023	Up	3.0063e-06	3.06501e-05	THSD1	thrombospondin, type I, domain containing 1	K06841;K04659;K08624	GO:0031224//intrinsic to membrane;GO:0043227//membrane-bounded organelle	-	-	gi|8923894|ref|NP_061146.1|/0/1
84803	2640	167	429	6.51	16.48	1.33999	Up	2.81826e-26	1.29057e-24	AGPAT9	1-acylglycerol-3-phosphate O-acyltransferase 9	K13506	GO:0031090//organelle membrane;GO:0031224//intrinsic to membrane;GO:0043231//intracellular membrane-bounded organelle	GO:0008374//O-acyltransferase activity	GO:0006641//triglyceride metabolic process;GO:0006644//phospholipid metabolic process;GO:0009966//regulation of signal transduction	gi|397525443|ref|XP_003832678.1|/0/1
84951	4090	3270.21	8455.57	82.71	208.41	1.33329	Up	0	0	TNS4	tensin 4	K00665;K11447;K00939	GO:0005924//cell-substrate adherens junction;GO:0043232	GO:0008092//cytoskeletal protein binding	GO:0012501//programmed cell death;GO:0033036	gi|157738639|ref|NP_116254.4|/0/1
202299	1931	27.98	72.03	1.52	3.81	1.32572	Up	8.40682e-06	7.96195e-05	C5orf27	chromosome 5 open reading frame 27	K07838	-	-	-	gi|27948768|gb|AAO25675.1|/4.43389e-51/1
6525	3328.87	751	1931	23.4	58.63	1.32513	Up	1.8054e-112	4.22825e-110	SMTN	smoothelin	K05699;K06115	GO:0005856//cytoskeleton	GO:0005198//structural molecule activity;GO:0008092//cytoskeletal protein binding	GO:0006936//muscle contraction;GO:0048513//organ development	gi|333360860|ref|NP_001193947.1|/0/1
84230	7207	125	321	1.79	4.47	1.32032	Up	4.83392e-20	1.68971e-18	LRRC8C	leucine rich repeat containing 8 family, member C	K12796	GO:0031090//organelle membrane;GO:0031224//intrinsic to membrane;GO:0043231//intracellular membrane-bounded organelle	-	-	gi|19923729|ref|NP_115646.2|/0/1
92737	3272	116	295	3.68	9.11	1.30775	Up	2.89824e-18	9.10225e-17	DNER	delta/notch-like EGF repeat containing	K02599	GO:0005768//endosome;GO:0031224//intrinsic to membrane;GO:0043005//neuron projection;GO:0044297//cell body	GO:0004872//receptor activity;GO:0005102//receptor binding;GO:0046872//metal ion binding	GO:0007166//cell surface receptor signaling pathway;GO:0007399//nervous system development;GO:0016192//vesicle-mediated transport;GO:0016477//cell migration;GO:0044267//cellular protein metabolic process;GO:0048747//muscle fiber development	gi|116235485|ref|NP_620711.3|/0/1
2707	1902.05	727	1812	39.53	97.28	1.2992	Up	2.87034e-100	5.66944e-98	GJB3	gap junction protein, beta 3, 31kDa	K07622	GO:0005921//gap junction	GO:0022829//wide pore channel activity	GO:0009987//cellular process;GO:0048513//organ development	gi|84040221|gb|AAI10641.1|/2.82637e-121/1
2635	3051	50	126	1.7	4.18	1.29797	Up	1.70647e-08	2.43692e-07	GBP3	guanylate binding protein 3	-	GO:0031224//intrinsic to membrane	GO:0017111//nucleoside-triphosphatase activity;GO:0032561//guanyl ribonucleotide binding	GO:0009207;GO:0019221//cytokine-mediated signaling pathway	gi|112382372|ref|NP_060754.2|/0/1
100506085	4365	131.9	332.02	3.12	7.66	1.2958	Up	2.96298e-20	1.04463e-18	LOC100506085	uncharacterized LOC100506085	K09228;K11447;K00939	-	-	-	gi|119625183|gb|EAX04778.1|/1.62111e-49/1
137994	1693	69	174	4.29	10.53	1.29546	Up	3.18234e-11	6.03834e-10	LETM2	leucine zipper-EF-hand containing transmembrane protein 2	-	-	-	-	gi|160013759|sp|Q2VYF4.2|LETM2_HUMAN/0/1
2152	2388.47	607	1509	26.54	64.2	1.2744	Up	1.9224e-83	2.89136e-81	F3	coagulation factor III (thromboplastin, tissue factor)	K03901	GO:0009897//external side of plasma membrane;GO:0031224//intrinsic to membrane;GO:0044421//extracellular region part;GO:0044424//intracellular part	GO:0008289//lipid binding;GO:0019899//enzyme binding	GO:0001935//endothelial cell proliferation;GO:0002237//response to molecule of bacterial origin;GO:0002526//acute inflammatory response;GO:0007599//hemostasis;GO:0009628//response to abiotic stimulus;GO:0010740//positive regulation of intracellular protein kinase cascade;GO:0014909//smooth muscle cell migration;GO:0034614//cellular response to reactive oxygen species;GO:0043066//negative regulati…	gi|339504|gb|AAA61151.1|/9.5051e-147/1
387590	1483	33.51	83.31	2.39	5.78	1.27406	Up	5.10034e-06	5.02192e-05	TPTEP1	transmembrane phosphatase with tensin homology pseudogene 1	K01104;K11447;K08857;K00939	-	-	-	gi|119578119|gb|EAW57715.1|/5.95174e-58/1
790952	3153	2077.93	5149.91	68.4	165.2	1.27215	Up	1.19345e-278	8.89334e-276	ESRG	embryonic stem cell related (non-protein coding)	K14757	-	-	-	gi|119578120|gb|EAW57716.1|/8.4418e-37/1
306	1634	1128	2794	72.66	175.3	1.27059	Up	6.55434e-152	2.06638e-149	ANXA3	annexin A3	-	GO:0030141//secretory granule;GO:0030666//endocytic vesicle membrane;GO:0043005//neuron projection;GO:0044297//cell body	GO:0004859//phospholipase inhibitor activity;GO:0005543//phospholipid binding;GO:0046872//metal ion binding	GO:0002283//neutrophil activation involved in immune response;GO:0006897//endocytosis;GO:0006952//defense response;GO:0009887//organ morphogenesis;GO:0010594//regulation of endothelial cell migration;GO:0010604;GO:0021543//pallium development;GO:0031960//response to corticosteroid stimulus;GO:0043388//positive regulation of DNA binding;GO:0045765//regulation of angiogenesis	gi|119626228|gb|EAX05823.1|/0/1
6567	4141	64	158	1.6	3.85	1.26679	Up	5.38944e-10	9.00657e-09	SLC16A2	solute carrier family 16, member 2 (thyroid hormone transporter)	K08231	GO:0005626//insoluble fraction;GO:0016021//integral to membrane	GO:0015291//secondary active transmembrane transporter activity;GO:0046943//carboxylic acid transmembrane transporter activity	GO:0006865//amino acid transport;GO:0009914//hormone transport	gi|458255|gb|AAB60375.1|/0/1
1903	4404	38.01	93	0.89	2.13	1.25898	Up	2.40878e-06	2.48831e-05	S1PR3	sphingosine-1-phosphate receptor 3	K04290	GO:0016021//integral to membrane	GO:0005488//binding;GO:0045125	GO:0006952//defense response;GO:0007188//adenylate cyclase-modulating G-protein coupled receptor signaling pathway;GO:0008283//cell proliferation;GO:0032502//developmental process;GO:0032611//interleukin-1 beta production;GO:0051480//cytosolic calcium ion homeostasis	gi|38788193|ref|NP_005217.2|/0/1
56938	7301.19	296.75	727.91	4.19	10	1.25498	Up	2.8283e-40	2.01596e-38	ARNTL2	aryl hydrocarbon receptor nuclear translocator-like 2	K09099	GO:0043231//intracellular membrane-bounded organelle	GO:0001071//nucleic acid binding transcription factor activity;GO:0003676//nucleic acid binding;GO:0060089	GO:0006355//regulation of transcription, DNA-dependent;GO:0009605//response to external stimulus;GO:0048511//rhythmic process	gi|351721480|ref|NP_001234933.1|/0/1
84981	2452	86	194	3.37	8.04	1.25445	Up	2.67056e-10	4.56054e-09	MIR22HG	MIR22 host gene (non-protein coding)	-	-	-	-	gi|397492014|ref|XP_003816928.1|/1.61054e-44/1
10098	3406	123	300	3.74	8.9	1.25077	Up	2.39236e-17	7.17008e-16	TSPAN5	tetraspanin 5	K10303	GO:0031224//intrinsic to membrane	-	-	gi|9625045|ref|NP_062517.1|/3.25926e-159/1
23034	6701.78	291	710	4.47	10.63	1.24979	Up	6.30636e-39	4.38078e-37	SAMD4A	sterile alpha motif domain containing 4A	-	GO:0005624//membrane fraction;GO:0043005//neuron projection;GO:0044424//intracellular part;GO:0044459//plasma membrane part	GO:0045182//translation regulator activity	GO:0006412//translation	gi|71051543|gb|AAH21726.2|/0/1
3084	2781.91	128	304	4.7	11.07	1.23592	Up	8.58734e-17	2.49611e-15	NRG1	neuregulin 1	K05455	GO:0016021//integral to membrane;GO:0031224//intrinsic to membrane;GO:0043231//intracellular membrane-bounded organelle;GO:0044421//extracellular region part;GO:0044459//plasma membrane part;GO:0045202//synapse	GO:0000989//transcription factor binding transcription factor activity;GO:0005102//receptor binding;GO:0030296//protein tyrosine kinase activator activity	GO:0007169//transmembrane receptor protein tyrosine kinase signaling pathway;GO:0007610//behavior;GO:0008015//blood circulation;GO:0008284//positive regulation of cell proliferation;GO:0008366//axon ensheathment;GO:0008645//hexose transport;GO:0009611//response to wounding;GO:0010659//cardiac muscle cell apoptotic process;GO:0014031//mesenchymal cell development;GO:0016049//cell growth;GO:0030155…	gi|7669526|ref|NP_039258.1|/0/1
3673	7870.8	1303	3159	17.12	40.25	1.23331	Up	4.29204e-165	1.4971e-162	ITGA2	integrin, alpha 2 (CD49B, alpha 2 subunit of VLA-2 receptor)	K06481	GO:0005887//integral to plasma membrane;GO:0009986//cell surface	GO:0004871//signal transducer activity;GO:0005515//protein binding	GO:0006935//chemotaxis;GO:0007166//cell surface receptor signaling pathway;GO:0007599//hemostasis;GO:0009653//anatomical structure morphogenesis;GO:0031589//cell-substrate adhesion;GO:0051704	gi|119575268|gb|EAW54873.1|/0/1
23762	4349	715	1720	16.99	39.84	1.22953	Up	1.66184e-89	2.8678e-87	OSBP2	oxysterol binding protein 2	K08283	GO:0044464//cell part	GO:0005488//binding	GO:0010876//lipid localization;GO:0051234//establishment of localization	gi|71891705|dbj|BAB33334.2|/0/1
6926	4781.3	57	137	1.23	2.88	1.22741	Up	1.70884e-08	2.43819e-07	TBX3	T-box 3	K10177	GO:0043231//intracellular membrane-bounded organelle	GO:0001071//nucleic acid binding transcription factor activity;GO:0003677//DNA binding;GO:0016564//transcription repressor activity	GO:0000578//embryonic axis specification;GO:0001944//vasculature development;GO:0003002//regionalization;GO:0003143//embryonic heart tube morphogenesis;GO:0006355//regulation of transcription, DNA-dependent;GO:0007568//aging;GO:0008283//cell proliferation;GO:0030900//forebrain development;GO:0032274//gonadotropin secretion;GO:0035051//cardiocyte differentiation;GO:0035115//embryonic forelimb morp…	gi|47419907|ref|NP_057653.3|/0/1
113146	18317	1031	2455	5.77	13.4	1.21559	Up	1.35606e-124	3.64447e-122	AHNAK2	AHNAK nucleoprotein 2	K13911	GO:0043231//intracellular membrane-bounded organelle	-	-	gi|156766050|ref|NP_612429.2|/0/1
6818	1408	83.54	197.55	6.27	14.45	1.20453	Up	2.22616e-11	4.29361e-10	SULT1A3	sulfotransferase family, cytosolic, 1A, phenol-preferring, member 3	K01014	GO:0044444//cytoplasmic part	GO:0008146//sulfotransferase activity	GO:0006576//cellular biogenic amine metabolic process;GO:0006629//lipid metabolic process;GO:0006790//sulfur compound metabolic process;GO:0009698//phenylpropanoid metabolic process	gi|29550921|ref|NP_808220.1|/1.85241e-162/1
8609	8396.6	290	699	3.63	8.34	1.20008	Up	1.51643e-37	1.01058e-35	KLF7	Kruppel-like factor 7 (ubiquitous)	K09207	GO:0043231//intracellular membrane-bounded organelle	GO:0001071//nucleic acid binding transcription factor activity;GO:0003676//nucleic acid binding;GO:0003712//transcription cofactor activity;GO:0046914//transition metal ion binding	GO:0006355//regulation of transcription, DNA-dependent;GO:0006935//chemotaxis;GO:0048667//cell morphogenesis involved in neuron differentiation;GO:0048812//neuron projection morphogenesis	gi|432172759|emb|CCO02791.1|/2.36545e-62/1
2863	2821	52	122	1.92	4.38	1.18982	Up	1.99374e-07	2.48369e-06	GPR39	G protein-coupled receptor 39	K08412	GO:0016021//integral to membrane	GO:0004888//transmembrane signaling receptor activity;GO:0043169//cation binding	GO:0007166//cell surface receptor signaling pathway	gi|4504097|ref|NP_001499.1|/0/1
3669	974	70	164	7.72	17.6	1.1889	Up	1.67427e-09	2.67264e-08	ISG20	interferon stimulated exonuclease gene 20kDa	K12579	GO:0016604//nuclear body	GO:0003676//nucleic acid binding;GO:0008296//3'-5'-exodeoxyribonuclease activity;GO:0043169//cation binding	GO:0006308//DNA catabolic process;GO:0016070//RNA metabolic process;GO:0019221//cytokine-mediated signaling pathway;GO:0051707//response to other organism	gi|58177183|pdb|1WLJ|A/1.21593e-89/1
201294	4406	192	448	4.5	10.24	1.18622	Up	2.80416e-23	1.13791e-21	UNC13D	unc-13 homolog D (C. elegans)	K15621	GO:0000323//lytic vacuole;GO:0005768//endosome;GO:0030133//transport vesicle	GO:0005488//binding	GO:0002323//natural killer cell activation involved in immune response;GO:0002460//adaptive immune response based on somatic recombination of immune receptors built from immunoglobulin superfamily domains;GO:0002886;GO:0006897//endocytosis;GO:0017157//regulation of exocytosis	gi|46195765|ref|NP_954712.1|/0/1
79400	2742.77	70	162.07	2.67	5.99	1.16572	Up	3.2429e-09	5.04403e-08	NOX5	NADPH oxidase, EF-hand calcium binding domain 5	K13411;K08008	GO:0031224//intrinsic to membrane;GO:0043231//intracellular membrane-bounded organelle	GO:0000166//nucleotide binding;GO:0005261//cation channel activity;GO:0005506//iron ion binding;GO:0050662//coenzyme binding;GO:0050664//oxidoreductase activity, acting on NAD(P)H, oxygen as acceptor	GO:0006091//generation of precursor metabolites and energy;GO:0006801//superoxide metabolic process;GO:0007342//fusion of sperm to egg plasma membrane;GO:0009306//protein secretion;GO:0012502//induction of programmed cell death;GO:0015992//proton transport;GO:0048646//anatomical structure formation involved in morphogenesis;GO:0050673//epithelial cell proliferation	gi|296278231|ref|NP_001171709.1|/0/1
3868	1720	815.34	1862.97	49.82	110.88	1.1542	Up	8.37296e-88	1.41512e-85	KRT16	keratin 16	K07604	GO:0043234//protein complex	GO:0005198//structural molecule activity;GO:0005488//binding	GO:0007010//cytoskeleton organization;GO:0009888//tissue development	gi|297273007|ref|XP_002800548.1|/0/1
56937	4747.57	1022	2352	22.43	49.87	1.15274	Up	5.42e-112	1.25149e-109	PMEPA1	prostate transmembrane protein, androgen induced 1	-	GO:0031224//intrinsic to membrane	GO:0019904//protein domain specific binding	GO:0030518//intracellular steroid hormone receptor signaling pathway	gi|441638094|ref|XP_004090104.1|/1.06146e-147/1
131566	6093	4061	9253	68.69	152.54	1.15102	Up	0	0	DCBLD2	discoidin, CUB and LCCL domain containing 2	K03902	GO:0016021//integral to membrane	-	GO:0007165//signal transduction;GO:0009611//response to wounding;GO:0016049//cell growth	gi|20330504|dbj|BAB91138.1|/0/1
7052	3745.37	836	1969	23.93	53.05	1.14853	Up	2.70382e-98	5.21487e-96	TGM2	transglutaminase 2 (C polypeptide, protein-glutamine-gamma-glutamyltransferase)	K05625	-	GO:0016747//transferase activity, transferring acyl groups other than amino-acyl groups;GO:0016755;GO:0043169//cation binding	GO:0006464//cellular protein modification process;GO:0006909//phagocytosis;GO:0030155//regulation of cell adhesion;GO:0060605;GO:0061138//morphogenesis of a branching epithelium	gi|39777599|ref|NP_945189.1|/0/1
3872	1574	6364	14478	426.01	943.99	1.14788	Up	0	0	KRT17	keratin 17	K07604	GO:0005882//intermediate filament	GO:0005198//structural molecule activity;GO:0005488//binding	GO:0006412//translation;GO:0016049//cell growth;GO:0030216//keratinocyte differentiation;GO:0045104//intermediate filament cytoskeleton organization;GO:0045684//positive regulation of epidermis development;GO:0048729//tissue morphogenesis	gi|395749169|ref|XP_003778896.1|/0/1
55619	7431	57	130	0.79	1.75	1.14743	Up	1.76612e-07	2.22038e-06	DOCK10	dedicator of cytokinesis 10	K05727	-	GO:0005088//Ras guanyl-nucleotide exchange factor activity;GO:0017016//Ras GTPase binding;GO:0032561//guanyl ribonucleotide binding	-	gi|154146189|ref|NP_055504.2|/0/1
1515	4542	400	909	9.1	20.15	1.14684	Up	2.50382e-43	1.964e-41	CTSL2	cathepsin L2	K01365;K01375	GO:0000267//cell fraction;GO:0000323//lytic vacuole;GO:0009986//cell surface;GO:0016023//cytoplasmic membrane-bounded vesicle;GO:0042995//cell projection;GO:0043025//neuronal cell body	GO:0004175//endopeptidase activity;GO:0005515//protein binding;GO:0008238//exopeptidase activity	GO:0003006//developmental process involved in reproduction;GO:0007399//nervous system development;GO:0009746;GO:0012501//programmed cell death;GO:0019538//protein metabolic process;GO:0031669//cellular response to nutrient levels;GO:0031960//response to corticosteroid stimulus;GO:0048232//male gamete generation	gi|297684916|ref|XP_002820055.1|/0/1
2191	2788	174	395	6.49	14.36	1.14577	Up	1.06373e-19	3.63307e-18	FAP	fibroblast activation protein, alpha	K08674	GO:0030027//lamellipodium;GO:0031224//intrinsic to membrane;GO:0031253//cell projection membrane	GO:0004175//endopeptidase activity;GO:0008238//exopeptidase activity;GO:0042802//identical protein binding	GO:0010715//regulation of extracellular matrix disassembly;GO:0016477//cell migration;GO:0019538//protein metabolic process	gi|16933540|ref|NP_004451.2|/0/1
968	1872	51.26	116.11	2.87	6.34	1.14343	Up	8.75698e-07	9.83301e-06	CD68	CD68 molecule	K06501	GO:0005626//insoluble fraction;GO:0016020//membrane;GO:0031090//organelle membrane;GO:0043231//intracellular membrane-bounded organelle;GO:0044444//cytoplasmic part	-	-	gi|91199550|ref|NP_001035148.1|/6.3007e-113/1
4501	468	70	159	16.95	37.42	1.14252	Up	8.62652e-09	1.28333e-07	MT1X	metallothionein 1X	K14739	-	-	-	gi|119603291|gb|EAW82885.1|/1.06431e-18/1
5270	2256.57	1350	3047	62.47	137.36	1.13673	Up	4.60698e-139	1.32503e-136	SERPINE2	serpin peptidase inhibitor, clade E (nexin, plasminogen activator inhibitor type 1), member 2	K03982	GO:0009897//external side of plasma membrane;GO:0030141//secretory granule;GO:0044421//extracellular region part;GO:0045202//synapse	GO:0004866//endopeptidase inhibitor activity;GO:0005515//protein binding;GO:0005539//glycosaminoglycan binding	GO:0007596//blood coagulation;GO:0010466//negative regulation of peptidase activity;GO:0010755;GO:0016477//cell migration;GO:0034111//negative regulation of homotypic cell-cell adhesion;GO:0045687//positive regulation of glial cell differentiation	gi|211904156|ref|NP_001130002.1|/0/1
3678	4267	835	1883	20.23	44.47	1.13634	Up	1.60785e-86	2.55914e-84	ITGA5	integrin, alpha 5 (fibronectin receptor, alpha polypeptide)	K06484	GO:0001726//ruffle;GO:0005624//membrane fraction;GO:0005887//integral to plasma membrane;GO:0005924//cell-substrate adherens junction;GO:0009986//cell surface;GO:0043234//protein complex	GO:0004871//signal transducer activity;GO:0005172//vascular endothelial growth factor receptor binding	GO:0001934//positive regulation of protein phosphorylation;GO:0002376//immune system process;GO:0006935//chemotaxis;GO:0007166//cell surface receptor signaling pathway;GO:0007599//hemostasis;GO:0007611//learning or memory;GO:0009967//positive regulation of signal transduction;GO:0016337//cell-cell adhesion;GO:0034329//cell junction assembly;GO:0044319//wound healing, spreading of cells;GO:0048646…	gi|119617187|gb|EAW96781.1|/0/1
9388	4143	232	521	5.79	12.68	1.13092	Up	5.75226e-25	2.48165e-23	LIPG	lipase, endothelial	K01046	GO:0044421//extracellular region part	GO:0004091//carboxylesterase activity;GO:0005539//glycosaminoglycan binding;GO:0016298//lipase activity	GO:0006644//phospholipid metabolic process;GO:0010982;GO:0030301//cholesterol transport;GO:0031323//regulation of cellular metabolic process;GO:0031667//response to nutrient levels;GO:0034369//plasma lipoprotein particle remodeling;GO:0055092//sterol homeostasis	gi|5174497|ref|NP_006024.1|/0/1
8900	1935.05	282	620	15.05	32.7	1.11953	Up	3.31792e-28	1.63345e-26	CCNA1	cyclin A1	K06627	GO:0005856//cytoskeleton;GO:0031981//nuclear lumen;GO:0044444//cytoplasmic part	GO:0005488//binding	GO:0000082//G1/S transition of mitotic cell cycle;GO:0000087//M phase of mitotic cell cycle;GO:0007127//meiosis I;GO:0048232//male gamete generation	gi|4502611|ref|NP_003905.1|/0/1
1604	2822.18	470	1045	17.33	37.52	1.11439	Up	1.83596e-47	1.54352e-45	CD55	CD55 molecule, decay accelerating factor for complement (Cromer blood group)	K04006	GO:0000267//cell fraction;GO:0016021//integral to membrane	-	GO:0002455//humoral immune response mediated by circulating immunoglobulin;GO:0006952//defense response;GO:0008152//metabolic process;GO:0051480//cytosolic calcium ion homeostasis	gi|168693643|ref|NP_001108224.1|/0/1
54509	2451	613.45	1348.11	26.09	55.86	1.09832	Up	2.29742e-59	2.54486e-57	RHOF	ras homolog family member F (in filopodia)	K07872	GO:0016020//membrane;GO:0043232;GO:0044444//cytoplasmic part	GO:0017111//nucleoside-triphosphatase activity;GO:0032561//guanyl ribonucleotide binding	GO:0009207;GO:0009966//regulation of signal transduction;GO:0030036//actin cytoskeleton organization;GO:0035556//intracellular signal transduction	gi|38016957|ref|NP_061907.2|/3.51916e-104/1
53834	3116.57	349	765	11.61	24.83	1.09672	Up	3.28366e-34	1.93641e-32	FGFRL1	fibroblast growth factor receptor-like 1	K01217;K05095;K05094	GO:0030133//transport vesicle;GO:0031224//intrinsic to membrane	GO:0004714//transmembrane receptor protein tyrosine kinase activity;GO:0005539//glycosaminoglycan binding;GO:0019838//growth factor binding	GO:0003170//heart valve development;GO:0007169//transmembrane receptor protein tyrosine kinase signaling pathway;GO:0008283//cell proliferation;GO:0016049//cell growth;GO:0060411//cardiac septum morphogenesis;GO:0060538//skeletal muscle organ development	gi|51988910|ref|NP_068742.2|/0/1
201799	3233	444	974	14.25	30.46	1.09595	Up	3.64368e-43	2.81766e-41	TMEM154	transmembrane protein 154	-	GO:0031224//intrinsic to membrane	-	-	gi|22749367|ref|NP_689893.1|/6.12908e-75/1
2491	2571	63	138	2.55	5.45	1.09576	Up	2.4415e-07	3.014e-06	CENPI	centromere protein I	K11501	GO:0031981//nuclear lumen;GO:0044427//chromosomal part;GO:0044444//cytoplasmic part	-	GO:0001541//ovarian follicle development;GO:0007067//mitosis;GO:0043486//histone exchange	gi|41352697|ref|NP_006724.2|/0/1
2533	4811.31	72	159	1.56	3.33	1.09398	Up	2.25408e-08	3.16382e-07	FYB	FYN binding protein	K14436	GO:0044444//cytoplasmic part	GO:0005488//binding	GO:0006464//cellular protein modification process;GO:0006606//protein import into nucleus;GO:0034330;GO:0035556//intracellular signal transduction;GO:0050851//antigen receptor-mediated signaling pathway	gi|340545556|ref|NP_001230022.1|/0/1
79628	26588	277	608	1.07	2.28	1.09142	Up	1.33935e-27	6.38296e-26	SH3TC2	SH3 domain and tetratricopeptide repeats 2	K11447	-	-	-	gi|38488692|ref|NP_078853.2|/0/1
284581	2260.3	74.02	160	3.38	7.2	1.09097	Up	4.17072e-08	5.68369e-07	LOC284581	uncharacterized LOC284581	K00854;K12417	-	GO:0005488//binding;GO:0016740//transferase activity;GO:0016787//hydrolase activity	GO:0006259//DNA metabolic process	gi|74729692|sp|Q8N9I1.1|YA028_HUMAN/3.10303e-51/1
259173	4674.49	179	417	4.22	8.98	1.08947	Up	1.02999e-21	3.9087e-20	ALS2CL	ALS2 C-terminal like	K04575	GO:0031410//cytoplasmic vesicle;GO:0044424//intracellular part	GO:0005088//Ras guanyl-nucleotide exchange factor activity;GO:0005515//protein binding;GO:0008047//enzyme activator activity	GO:0006996//organelle organization;GO:0007266//Rho protein signal transduction;GO:0033036	gi|33359215|ref|NP_667340.2|/0/1
4286	4792.82	78	173	1.71	3.63	1.08597	Up	4.62248e-09	7.02326e-08	MITF	microphthalmia-associated transcription factor	K09455	GO:0043231//intracellular membrane-bounded organelle	GO:0000981//sequence-specific DNA binding RNA polymerase II transcription factor activity;GO:0003676//nucleic acid binding;GO:0030528//transcription regulator activity	GO:0001654//eye development;GO:0002761//regulation of myeloid leukocyte differentiation;GO:0006351//transcription, DNA-dependent;GO:0006357//regulation of transcription from RNA polymerase II promoter;GO:0006915//apoptotic process;GO:0007166//cell surface receptor signaling pathway;GO:0008283//cell proliferation;GO:0032501//multicellular organismal process;GO:0048771//tissue remodeling;GO:0050931…	gi|4557755|ref|NP_000239.1|/0/1
55057	5245	58	126	1.14	2.42	1.08597	Up	1.0216e-06	1.13163e-05	AIM1L	absent in melanoma 1-like	K03626	-	-	-	gi|301069394|ref|NP_001034864.2|/0/1
100862671	2116	40	87	1.98	4.19	1.08145	Up	4.90852e-05	0.00039758	LOC100862671	uncharacterized LOC100862671	K00871	GO:0032991//macromolecular complex;GO:0043231//intracellular membrane-bounded organelle	GO:0003676//nucleic acid binding;GO:0003712//transcription cofactor activity;GO:0004468//lysine N-acetyltransferase activity;GO:0017111//nucleoside-triphosphatase activity;GO:0032559	GO:0006325//chromatin organization;GO:0006355//regulation of transcription, DNA-dependent;GO:0051704	gi|378744186|ref|NP_001243758.1|/1.06868e-45/1
5292	2751	41	89	1.55	3.28	1.08143	Up	4.16528e-05	0.000342971	PIM1	pim-1 oncogene	K04702	GO:0016020//membrane;GO:0043231//intracellular membrane-bounded organelle	GO:0004672//protein kinase activity;GO:0005515//protein binding;GO:0032559;GO:0046914//transition metal ion binding	GO:0006915//apoptotic process;GO:0031657;GO:0032501//multicellular organismal process;GO:0043392//negative regulation of DNA binding	gi|332823991|ref|XP_003311330.1|/0/1
5655	2986.31	750	1626	26.07	55.12	1.08019	Up	3.74032e-69	4.71683e-67	KLK10	kallikrein-related peptidase 10	K09619	-	GO:0004175//endopeptidase activity	GO:0009987//cellular process;GO:0019538//protein metabolic process	gi|297705637|ref|XP_002829676.1|/7.57546e-164/1
3667	8743	78	168	0.92	1.93	1.0689	Up	2.19334e-08	3.0812e-07	IRS1	insulin receptor substrate 1	K07187	GO:0005887//integral to plasma membrane;GO:0042598;GO:0043231//intracellular membrane-bounded organelle;GO:0044444//cytoplasmic part	GO:0004714//transmembrane receptor protein tyrosine kinase activity;GO:0005102//receptor binding;GO:0019901//protein kinase binding;GO:0019904//protein domain specific binding;GO:0030674//protein binding, bridging	GO:0005979//regulation of glycogen biosynthetic process;GO:0006635//fatty acid beta-oxidation;GO:0007169//transmembrane receptor protein tyrosine kinase signaling pathway;GO:0007243//intracellular protein kinase cascade;GO:0008284//positive regulation of cell proliferation;GO:0009967//positive regulation of signal transduction;GO:0009968//negative regulation of signal transduction;GO:0010828//pos…	gi|5031805|ref|NP_005535.1|/0/1
112464	1039	89	191	9.17	19.15	1.06235	Up	2.76442e-09	4.33269e-08	PRKCDBP	protein kinase C, delta binding protein	-	-	-	-	gi|47132587|ref|NP_659477.2|/3.70987e-71/1
2920	1234	59	126	5.08	10.56	1.05571	Up	1.61287e-06	1.72144e-05	CXCL2	chemokine (C-X-C motif) ligand 2	K05505	GO:0000267//cell fraction;GO:0044421//extracellular region part	GO:0005125//cytokine activity;GO:0030234//enzyme regulator activity	GO:0006952//defense response;GO:0007010//cytoskeleton organization;GO:0007166//cell surface receptor signaling pathway;GO:0008283//cell proliferation;GO:0009607//response to biotic stimulus;GO:0030595//leukocyte chemotaxis;GO:0048731	gi|4504155|ref|NP_002080.1|/8.50434e-36/1
5268	2633	2312	4929	91.41	189.88	1.05466	Up	2.36112e-198	1.10595e-195	SERPINB5	serpin peptidase inhibitor, clade B (ovalbumin), member 5	K10139	GO:0044421//extracellular region part;GO:0044424//intracellular part	GO:0004866//endopeptidase inhibitor activity;GO:0005488//binding	GO:0003006//developmental process involved in reproduction;GO:0006508//proteolysis;GO:0010466//negative regulation of peptidase activity;GO:0042127//regulation of cell proliferation;GO:0043062//extracellular structure organization;GO:0048729//tissue morphogenesis	gi|167860126|ref|NP_002630.2|/0/1
2113	5242	452	961	8.9	18.44	1.05096	Up	6.5426e-40	4.62325e-38	ETS1	v-ets erythroblastosis virus E26 oncogene homolog 1 (avian)	K02678	GO:0043231//intracellular membrane-bounded organelle;GO:0043234//protein complex	GO:0001071//nucleic acid binding transcription factor activity;GO:0003677//DNA binding;GO:0005515//protein binding;GO:0030528//transcription regulator activity	GO:0006928//cellular component movement;GO:0008283//cell proliferation;GO:0009605//response to external stimulus;GO:0010551;GO:0012502//induction of programmed cell death;GO:0016477//cell migration;GO:0021536//diencephalon development;GO:0022602//ovulation cycle process;GO:0022617//extracellular matrix disassembly;GO:0030575;GO:0034097//response to cytokine stimulus;GO:0034405//response to fluid …	gi|4885219|ref|NP_005229.1|/0/1
7718	2411	92	195	3.98	8.22	1.04637	Up	3.13044e-09	4.87374e-08	ZNF165	zinc finger protein 165	K09230	GO:0043231//intracellular membrane-bounded organelle	GO:0001071//nucleic acid binding transcription factor activity;GO:0003676//nucleic acid binding;GO:0046914//transition metal ion binding	GO:0006351//transcription, DNA-dependent	gi|4508001|ref|NP_003438.1|/0/1
126353	2907	321	679	11.48	23.65	1.04272	Up	2.23754e-28	1.11496e-26	C19orf21	chromosome 19 open reading frame 21	-	-	-	-	gi|27735067|ref|NP_775752.1|/0/1
2335	8396.17	1037	2195	12.75	26.21	1.03962	Up	5.13548e-88	8.7699e-86	FN1	fibronectin 1	K05717	GO:0005578//proteinaceous extracellular matrix;GO:0005615//extracellular space;GO:0031012//extracellular matrix;GO:0031091//platelet alpha granule;GO:0044459//plasma membrane part	GO:0005198//structural molecule activity;GO:0005515//protein binding;GO:0005539//glycosaminoglycan binding;GO:0008047//enzyme activator activity;GO:0019899//enzyme binding;GO:0046914//transition metal ion binding	GO:0000904//cell morphogenesis involved in differentiation;GO:0001775//cell activation;GO:0002376//immune system process;GO:0002526//acute inflammatory response;GO:0006464//cellular protein modification process;GO:0006887//exocytosis;GO:0007599//hemostasis;GO:0009611//response to wounding;GO:0031589//cell-substrate adhesion;GO:0034329//cell junction assembly;GO:0043062//extracellular structure or…	gi|62089266|dbj|BAD93077.1|/0/1
3552	2943	85	179	3	6.16	1.03797	Up	1.76361e-08	2.51195e-07	IL1A	interleukin 1, alpha	K04383	GO:0044421//extracellular region part;GO:0044444//cytoplasmic part	GO:0005126//cytokine receptor binding;GO:0046914//transition metal ion binding	GO:0001819//positive regulation of cytokine production;GO:0002237//response to molecule of bacterial origin;GO:0002376//immune system process;GO:0006694//steroid biosynthetic process;GO:0006953//acute-phase response;GO:0007088//regulation of mitosis;GO:0007166//cell surface receptor signaling pathway;GO:0007249//I-kappaB kinase/NF-kappaB cascade;GO:0008283//cell proliferation;GO:0009408//response…	gi|27894330|ref|NP_000566.3|/4.72927e-151/1
5570	1880.25	51.52	110.48	2.93	6	1.03406	Up	5.9341e-06	5.75302e-05	PKIB	protein kinase (cAMP-dependent, catalytic) inhibitor beta	K09228;K00797	-	GO:0030291//protein serine/threonine kinase inhibitor activity	GO:0033673//negative regulation of kinase activity	gi|393715070|ref|NP_001257323.1|/6.26282e-32/1
7378	1800.56	833	1752	48.64	99.49	1.03241	Up	1.22711e-69	1.55948e-67	UPP1	uridine phosphorylase 1	K00757	GO:0044444//cytoplasmic part	GO:0016763//transferase activity, transferring pentosyl groups	GO:0008655//pyrimidine-containing compound salvage;GO:0009112;GO:0009117//nucleotide metabolic process;GO:0046131	gi|4507839|ref|NP_003355.1|/7.18401e-168/1
9260	1563.91	828	1769	56.9	116.11	1.02899	Up	9.33844e-73	1.24467e-70	PDLIM7	PDZ and LIM domain 7 (enigma)	K05629;K05760	GO:0005924//cell-substrate adherens junction;GO:0031252//cell leading edge;GO:0032432//actin filament bundle	GO:0046914//transition metal ion binding	GO:0006897//endocytosis;GO:0007010//cytoskeleton organization;GO:0032501//multicellular organismal process;GO:0045597//positive regulation of cell differentiation	gi|47157328|ref|NP_998801.1|/2.47421e-117/1
54852	5190	521	1091	10.36	21.14	1.02895	Up	1.31019e-43	1.03266e-41	PAQR5	progestin and adipoQ receptor family member V	K07297	GO:0031224//intrinsic to membrane	GO:0004871//signal transducer activity;GO:0008289//lipid binding	GO:0007292//female gamete generation;GO:0023052//signaling;GO:0048869//cellular developmental process	gi|157389021|ref|NP_001098024.1|/0/1
55612	5167	673	1393	13.44	27.12	1.01282	Up	8.95548e-54	8.79139e-52	FERMT1	fermitin family member 1	K06271	GO:0001726//ruffle;GO:0005884//actin filament;GO:0005924//cell-substrate adherens junction;GO:0044444//cytoplasmic part	-	GO:0008283//cell proliferation;GO:0016477//cell migration;GO:0030010//establishment of cell polarity	gi|116686114|ref|NP_060141.3|/0/1
10395	5806.5	138	281	2.42	4.86	1.00595	Up	1.10665e-11	2.17274e-10	DLC1	deleted in liver cancer 1	K10360;K08773;K07526;K12490	GO:0005924//cell-substrate adherens junction;GO:0032432//actin filament bundle;GO:0043231//intracellular membrane-bounded organelle;GO:0044444//cytoplasmic part	GO:0005100//Rho GTPase activator activity;GO:0008092//cytoskeletal protein binding;GO:0019899//enzyme binding;GO:0019904//protein domain specific binding	GO:0006470//protein dephosphorylation;GO:0006915//apoptotic process;GO:0007044//cell-substrate junction assembly;GO:0007266//Rho protein signal transduction;GO:0007420//brain development;GO:0008283//cell proliferation;GO:0009887//organ morphogenesis;GO:0009966//regulation of signal transduction;GO:0010863//positive regulation of phospholipase C activity;GO:0012502//induction of programmed cell de…	gi|33188437|ref|NP_006085.2|/0/1
3157	5416.79	1631	3357	31.09	62.31	1.00301	Up	2.42038e-125	6.61328e-123	HMGCS1	3-hydroxy-3-methylglutaryl-CoA synthase 1 (soluble)	K01641	GO:0000267//cell fraction;GO:0044444//cytoplasmic part	GO:0042802//identical protein binding;GO:0046912//transferase activity, transferring acyl groups, acyl groups converted into alkyl on transfer	GO:0006694//steroid biosynthetic process;GO:0006720//isoprenoid metabolic process;GO:0007417//central nervous system development;GO:0008203//cholesterol metabolic process;GO:0008406//gonad development;GO:0009642//response to light intensity;GO:0010038//response to metal ion;GO:0014070//response to organic cyclic compound;GO:0032354//response to follicle-stimulating hormone stimulus;GO:0033273//re…	gi|33991031|gb|AAH00297.2|/0/1
136319	3900	320.7	0	8.51	0.001	-13.0549	Down	8.11868e-99	1.5845e-96	MTPN	myotrophin	K10380;K15502	GO:0043005//neuron projection;GO:0044424//intracellular part	GO:0005488//binding	GO:0006412//translation;GO:0006576//cellular biogenic amine metabolic process;GO:0014706//striated muscle tissue development;GO:0021533//cell differentiation in hindbrain;GO:0042246//tissue regeneration;GO:0042692//muscle cell differentiation	gi|302148690|pdb|3AAA|C/9.57698e-62/1
445329	1397	96.96	0	7.34	0.001	-12.8416	Down	3.70686e-30	1.96033e-28	SULT1A4	sulfotransferase family, cytosolic, 1A, phenol-preferring, member 4	K01014	GO:0044444//cytoplasmic part	GO:0008146//sulfotransferase activity	GO:0006576//cellular biogenic amine metabolic process;GO:0006629//lipid metabolic process;GO:0006790//sulfur compound metabolic process;GO:0009698//phenylpropanoid metabolic process	gi|29550921|ref|NP_808220.1|/1.83567e-162/1
100526737	1170.24	21.87	0	1.99	0.001	-10.9586	Down	3.61148e-07	4.32481e-06	RBM14-RBM4	RBM14-RBM4 readthrough	K13187;K13189	GO:0031981//nuclear lumen;GO:0043234//protein complex;GO:0044424//intracellular part	GO:0003676//nucleic acid binding;GO:0003713//transcription coactivator activity;GO:0003729//mRNA binding;GO:0005515//protein binding;GO:0016251//general RNA polymerase II transcription factor activity	GO:0006259//DNA metabolic process;GO:0006357//regulation of transcription from RNA polymerase II promoter;GO:0006396//RNA processing;GO:0006412//translation;GO:0006476//protein deacetylation;GO:0007623//circadian rhythm;GO:0009719;GO:0031958	gi|311771547|ref|NP_001185775.1|/7.55138e-62/1
100533179	2972	25.04	0	0.88	0.001	-9.78136	Down	2.14596e-08	3.01982e-07	UBE2F-SCLY	UBE2F-SCLY readthrough	K01763	GO:0044444//cytoplasmic part	GO:0016846//carbon-sulfur lyase activity;GO:0048037//cofactor binding	GO:0019752//carboxylic acid metabolic process	gi|167016561|sp|Q96I15.2|SCLY_HUMAN/0/1
146723	2525	21	0	0.87	0.001	-9.76487	Down	3.61148e-07	4.32797e-06	C17orf77	chromosome 17 open reading frame 77	K14693;K00939;K14443	-	-	-	gi|48255962|ref|NP_689673.2|/1.08572e-124/1
100861412	5418	32.23	0	0.61	0.001	-9.25267	Down	1.53466e-10	2.71697e-09	FSBP	fibrinogen silencer binding protein	K11447;K00939;K10877;K00797	GO:0043231//intracellular membrane-bounded organelle	GO:0003677//DNA binding;GO:0004386//helicase activity;GO:0032559	GO:0000725//recombinational repair;GO:0006351//transcription, DNA-dependent;GO:0009314//response to radiation;GO:0042221//response to chemical stimulus	gi|371502131|ref|NP_001243070.1|/9.16537e-159/1
100631383	3060	13.66	0	0.46	0.001	-8.84549	Down	0.000102285	0.000765337	FAM47E-STBD1	FAM47E-STBD1 readthrough	-	GO:0005626//insoluble fraction;GO:0016021//integral to membrane	GO:0005488//binding	GO:0003012//muscle system process;GO:0044238//primary metabolic process	gi|339515678|ref|NP_001229868.1|/0/1
100533105	4563	16.43	0	0.37	0.001	-8.53138	Down	1.23101e-05	0.000113954	C8orf44-SGK3	C8orf44-SGK3 readthrough	K13304	GO:0005768//endosome;GO:0031410//cytoplasmic vesicle	GO:0004672//protein kinase activity;GO:0005543//phospholipid binding;GO:0032559	GO:0006464//cellular protein modification process;GO:0043066//negative regulation of apoptotic process;GO:0050896//response to stimulus	gi|31563382|ref|NP_037389.4|/0/1
948	4727	42	4	1.51	0.09	-4.06848	Down	1.69432e-09	2.70202e-08	CD36	CD36 molecule (thrombospondin receptor)	K06259	GO:0009986//cell surface;GO:0016021//integral to membrane;GO:0030667//secretory granule membrane;GO:0042598;GO:0044459//plasma membrane part	GO:0008289//lipid binding;GO:0008329//pattern recognition receptor activity;GO:0019838//growth factor binding;GO:0030169//low-density lipoprotein particle binding;GO:0051635//bacterial cell surface binding	GO:0000122//negative regulation of transcription from RNA polymerase II promoter;GO:0001525//angiogenesis;GO:0001775//cell activation;GO:0001819//positive regulation of cytokine production;GO:0001934//positive regulation of protein phosphorylation;GO:0001952//regulation of cell-matrix adhesion;GO:0006631//fatty acid metabolic process;GO:0006639//acylglycerol metabolic process;GO:0006887//exocytos…	gi|48375176|ref|NP_001001547.1|/0/1
3240	1284	16	1	1.23	0.08	-3.94251	Down	0.00011826	0.000877261	HP	haptoglobin	K01330;K14477	GO:0043234//protein complex;GO:0044421//extracellular region part	GO:0004175//endopeptidase activity;GO:0005515//protein binding	GO:0000302//response to reactive oxygen species;GO:0006875//cellular metal ion homeostasis;GO:0008219//cell death;GO:0010727//negative regulation of hydrogen peroxide metabolic process;GO:0019538//protein metabolic process;GO:0043086//negative regulation of catalytic activity	gi|119579601|gb|EAW59197.1|/0/1
25803	1914	204	17	11.25	0.91	-3.62791	Down	3.46858e-43	2.69497e-41	SPDEF	SAM pointed domain containing ets transcription factor	K09442	GO:0043231//intracellular membrane-bounded organelle	GO:0001071//nucleic acid binding transcription factor activity;GO:0003677//DNA binding	GO:0000122//negative regulation of transcription from RNA polymerase II promoter;GO:0006915//apoptotic process;GO:0032501//multicellular organismal process	gi|6912580|ref|NP_036523.1|/2.47488e-179/1
2354	3709.9	1592	175	43.71	4.76	-3.19893	Down	5.3392e-294	4.37654e-291	FOSB	FBJ murine osteosarcoma viral oncogene homolog B	K09029	GO:0043231//intracellular membrane-bounded organelle	GO:0001071//nucleic acid binding transcription factor activity;GO:0003677//DNA binding;GO:0005515//protein binding;GO:0043566//structure-specific DNA binding;GO:0046983//protein dimerization activity	GO:0006357//regulation of transcription from RNA polymerase II promoter;GO:0009605//response to external stimulus;GO:0014072;GO:0022414//reproductive process;GO:0032501//multicellular organismal process;GO:0050896//response to stimulus;GO:0051384//response to glucocorticoid stimulus;GO:0051592//response to calcium ion	gi|166999783|ref|NP_001107643.1|/8.23096e-116/1
79094	1578	295	33	19.7	2.15	-3.19579	Down	1.88103e-55	1.92735e-53	CHAC1	ChaC, cation transport regulator homolog 1 (E. coli)	K07232	GO:0044444//cytoplasmic part	GO:0005488//binding	GO:0006915//apoptotic process;GO:0006950//response to stress	gi|332843575|ref|XP_523053.3|/2.74789e-133/1
199974	1907	26	3	1.43	0.16	-3.15987	Down	6.2058e-06	5.98106e-05	CYP4Z1	cytochrome P450, family 4, subfamily Z, polypeptide 1	K07428;K07429	GO:0031090//organelle membrane;GO:0031224//intrinsic to membrane;GO:0042598;GO:0043231//intracellular membrane-bounded organelle	GO:0005506//iron ion binding;GO:0016712//oxidoreductase activity, acting on paired donors, with incorporation or reduction of molecular oxygen, reduced flavin or flavoprotein as one donor, and incorporation of one atom of oxygen	GO:0008152//metabolic process	gi|30023836|ref|NP_835235.1|/0/1
2299	2175.27	95	13	4.32	0.61	-2.82415	Down	2.8936e-17	8.65651e-16	FOXI1	forkhead box I1	K09401	GO:0043231//intracellular membrane-bounded organelle;GO:0043234//protein complex	GO:0000981//sequence-specific DNA binding RNA polymerase II transcription factor activity;GO:0003702//RNA polymerase II transcription factor activity;GO:0005515//protein binding;GO:0016564//transcription repressor activity;GO:0043565//sequence-specific DNA binding;GO:0043566//structure-specific DNA binding	GO:0000122//negative regulation of transcription from RNA polymerase II promoter;GO:0001708//cell fate specification;GO:0010551;GO:0030916//otic vesicle formation	gi|21618329|ref|NP_658982.1|/1.14636e-158/1
80303	1607	29	4	1.7	0.26	-2.70895	Down	4.42138e-06	4.39032e-05	EFHD1	EF-hand domain family, member D1	-	GO:0019866//organelle inner membrane;GO:0043231//intracellular membrane-bounded organelle	GO:0046872//metal ion binding	GO:0030030//cell projection organization	gi|62089010|dbj|BAD92952.1|/2.49508e-97/1
2051	4044	53	9	1.36	0.22	-2.62803	Down	3.43918e-09	5.33415e-08	EPHB6	EPH receptor B6	K05114	GO:0016021//integral to membrane	GO:0004714//transmembrane receptor protein tyrosine kinase activity;GO:0032559	GO:0006464//cellular protein modification process;GO:0007167//enzyme linked receptor protein signaling pathway	gi|194097332|ref|NP_004436.2|/0/1
54873	2601	143	24	5.72	0.94	-2.60528	Down	1.02137e-22	4.04452e-21	PALMD	palmdelphin	-	GO:0044424//intracellular part	-	GO:0065008	gi|8923243|ref|NP_060204.1|/0/1
29993	4332	29	5	0.69	0.12	-2.52356	Down	1.62229e-05	0.000145811	PACSIN1	protein kinase C and casein kinase substrate in neurons 1	K06106;K10408;K12804	GO:0005798//Golgi-associated vesicle	GO:0005515//protein binding;GO:0016301//kinase activity	GO:0006996//organelle organization;GO:0030100//regulation of endocytosis	gi|20521900|dbj|BAA92617.2|/0/1
79190	2337	38	7	1.7	0.3	-2.5025	Down	1.2153e-06	1.33536e-05	IRX6	iroquois homeobox 6	K15613	-	-	-	gi|42544241|ref|NP_077311.2|/0/1
56901	1275	76	14	6.33	1.13	-2.48588	Down	4.69254e-12	9.56835e-11	NDUFA4L2	NADH dehydrogenase (ubiquinone) 1 alpha subcomplex, 4-like 2	K03948	-	-	-	gi|332207482|ref|XP_003252826.1|/3.05695e-52/1
10551	996	268	51	28.85	5.35	-2.43096	Down	4.00508e-38	2.70203e-36	AGR2	anterior gradient 2 homolog (Xenopus laevis)	K05360	GO:0043231//intracellular membrane-bounded organelle	GO:0005488//binding	GO:0007589//body fluid secretion	gi|68012756|gb|AAY84773.1|/1.14007e-90/1
93273	753.61	103	21	15.49	2.95	-2.39255	Down	7.27784e-15	1.83276e-13	LEMD1	LEM domain containing 1	-	GO:0012505//endomembrane system;GO:0031224//intrinsic to membrane	-	-	gi|56676324|ref|NP_001001552.3|/1.34547e-56/1
140893	2853	30	6	1.09	0.21	-2.37587	Down	2.99018e-05	0.00025347	RBBP8NL	RBBP8 N-terminal like	-	-	-	-	gi|288541306|ref|NP_543023.2|/0/1
283248	2621	30	6	1.19	0.23	-2.37126	Down	2.99018e-05	0.000253339	RCOR2	REST corepressor 2	K11829	GO:0043231//intracellular membrane-bounded organelle;GO:0043234//protein complex;GO:0044427//chromosomal part	GO:0001071//nucleic acid binding transcription factor activity;GO:0003676//nucleic acid binding;GO:0003712//transcription cofactor activity	GO:0006355//regulation of transcription, DNA-dependent	gi|119594587|gb|EAW74181.1|/0/1
25840	3390	358	73	10.95	2.18	-2.32853	Down	5.17436e-48	4.39526e-46	METTL7A	methyltransferase like 7A	K11447	GO:0043231//intracellular membrane-bounded organelle;GO:0044444//cytoplasmic part	GO:0016741	-	gi|89145417|ref|NP_054752.3|/4.25495e-143/1
563	1278	141	29	11.71	2.34	-2.32316	Down	1.03347e-19	3.53709e-18	AZGP1	alpha-2-glycoprotein 1, zinc-binding	K06751	GO:0042611	GO:0004518//nuclease activity;GO:0008289//lipid binding;GO:0008565//protein transporter activity	GO:0002376//immune system process;GO:0006629//lipid metabolic process;GO:0008283//cell proliferation;GO:0009987//cellular process	gi|4502337|ref|NP_001176.1|/2.2606e-172/1
9542	3939	85	18	2.24	0.46	-2.28379	Down	3.45078e-12	7.10705e-11	NRG2	neuregulin 2	K05456	GO:0031224//intrinsic to membrane	GO:0005102//receptor binding;GO:0070851//growth factor receptor binding	GO:0007169//transmembrane receptor protein tyrosine kinase signaling pathway;GO:0007275//multicellular organismal development;GO:0023052//signaling	gi|7669532|ref|NP_053586.1|/0/1
1831	1986	369	78	19.44	4.01	-2.27735	Down	3.8202e-48	3.29623e-46	TSC22D3	TSC22 domain family, member 3	-	GO:0043231//intracellular membrane-bounded organelle	GO:0001071//nucleic acid binding transcription factor activity;GO:0043426//MRF binding	GO:0000122//negative regulation of transcription from RNA polymerase II promoter;GO:0006351//transcription, DNA-dependent;GO:0006950//response to stress;GO:0043066//negative regulation of apoptotic process;GO:0045843//negative regulation of striated muscle tissue development;GO:0046903//secretion	gi|403289575|ref|XP_003935927.1|/3.72602e-124/1
23581	3153	28	6	0.92	0.19	-2.27563	Down	8.68156e-05	0.000662904	CASP14	caspase 14, apoptosis-related cysteine peptidase	K04401	GO:0043231//intracellular membrane-bounded organelle	GO:0004175//endopeptidase activity	GO:0009888//tissue development;GO:0012502//induction of programmed cell death;GO:0019538//protein metabolic process;GO:0048869//cellular developmental process	gi|6912286|ref|NP_036246.1|/7.20909e-121/1
816	3995.23	269	59	6.92	1.49	-2.21546	Down	1.48038e-34	8.92258e-33	CAMK2B	calcium/calmodulin-dependent protein kinase II beta	K04515	GO:0016020//membrane;GO:0030139//endocytic vesicle;GO:0031981//nuclear lumen;GO:0043234//protein complex;GO:0044430//cytoskeletal part	GO:0004674//protein serine/threonine kinase activity;GO:0005515//protein binding;GO:0032559	GO:0002029//desensitization of G-protein coupled receptor protein signaling pathway;GO:0006464//cellular protein modification process;GO:0006468//protein phosphorylation;GO:0007267//cell-cell signaling;GO:0007271//synaptic transmission, cholinergic;GO:0008624;GO:0010038//response to metal ion;GO:0019221//cytokine-mediated signaling pathway;GO:0045836//positive regulation of meiosis;GO:0048168//re…	gi|402863598|ref|XP_003896094.1|/0/1
401546	2698	45	10	1.74	0.38	-2.19502	Down	7.84258e-07	8.89151e-06	C9orf152	chromosome 9 open reading frame 152	-	-	-	-	gi|163644318|ref|NP_001013011.2|/4.91066e-139/1
4311	5707.2	282	64	5.15	1.13	-2.18825	Down	3.38648e-35	2.10295e-33	MME	membrane metallo-endopeptidase	K01389	GO:0005626//insoluble fraction;GO:0016021//integral to membrane;GO:0030136//clathrin-coated vesicle;GO:0043005//neuron projection;GO:0044463	GO:0004175//endopeptidase activity;GO:0046914//transition metal ion binding	GO:0007154//cell communication;GO:0009100//glycoprotein metabolic process;GO:0019538//protein metabolic process	gi|116256327|ref|NP_009218.2|/0/1
5608	1879	30	7	1.67	0.38	-2.13578	Down	8.51604e-05	0.000651175	MAP2K6	mitogen-activated protein kinase kinase 6	K04433	GO:0031981//nuclear lumen;GO:0044444//cytoplasmic part	GO:0004712//protein serine/threonine/tyrosine kinase activity;GO:0032559	GO:0000165//MAPK cascade;GO:0002224//toll-like receptor signaling pathway;GO:0006468//protein phosphorylation;GO:0006915//apoptotic process;GO:0006941//striated muscle contraction;GO:0007166//cell surface receptor signaling pathway;GO:0022402//cell cycle process;GO:0042221//response to chemical stimulus;GO:0045597//positive regulation of cell differentiation	gi|402900907|ref|XP_003913403.1|/0/1
4902	1141	42	10	3.92	0.91	-2.10692	Down	3.62834e-06	3.64926e-05	NRTN	neurturin	K05452	GO:0043005//neuron projection	GO:0005102//receptor binding	GO:0001667//ameboidal cell migration;GO:0006935//chemotaxis;GO:0007167//enzyme linked receptor protein signaling pathway;GO:0007243//intracellular protein kinase cascade;GO:0007399//nervous system development;GO:0030030//cell projection organization	gi|426386787|ref|XP_004059862.1|/2.85223e-67/1
6783	1805	313	75	18.2	4.25	-2.0984	Down	3.40818e-37	2.26209e-35	SULT1E1	sulfotransferase family 1E, estrogen-preferring, member 1	K01016	GO:0005635//nuclear envelope;GO:0044444//cytoplasmic part	GO:0008146//sulfotransferase activity;GO:0008289//lipid binding	GO:0006790//sulfur compound metabolic process;GO:0008202//steroid metabolic process;GO:0022414//reproductive process	gi|4885617|ref|NP_005411.1|/1.54005e-175/1
283120	2322	665	162	29.88	7.09	-2.07532	Down	4.85768e-76	6.69217e-74	H19	H19, imprinted maternally expressed transcript (non-protein coding)	-	-	-	-	gi|119622882|gb|EAX02477.1|/2.80676e-87/1
100526664	8751	50	12.04	0.58	0.14	-2.05063	Down	4.51812e-07	5.32112e-06	LY75-CD302	LY75-CD302 readthrough	K06559	GO:0016021//integral to membrane	-	GO:0002376//immune system process;GO:0006952//defense response	gi|311771585|ref|NP_001185689.1|/0/1
25837	1641	87	22	5.58	1.37	-2.02609	Down	6.66008e-11	1.21048e-09	RAB26	RAB26, member RAS oncogene family	K07913	GO:0031224//intrinsic to membrane	GO:0017111//nucleoside-triphosphatase activity;GO:0032561//guanyl ribonucleotide binding	GO:0006887//exocytosis;GO:0009207;GO:0035556//intracellular signal transduction;GO:0048731	gi|46361978|ref|NP_055168.2|/9.58488e-129/1
128553	12204	85.03	22	0.72	0.18	-2	Down	1.75682e-10	3.08365e-09	TSHZ2	teashirt zinc finger homeobox 2	K09236	GO:0043231//intracellular membrane-bounded organelle	GO:0001071//nucleic acid binding transcription factor activity;GO:0003677//DNA binding;GO:0046914//transition metal ion binding	GO:0006351//transcription, DNA-dependent;GO:0032501//multicellular organismal process	gi|301171536|ref|NP_001180350.1|/0/1
91653	4293	45	12	1.08	0.28	-1.94753	Down	5.29826e-06	5.19185e-05	BOC	BOC cell adhesion associated, oncogene regulated	K06765;K06766	GO:0030427//site of polarized growth;GO:0031224//intrinsic to membrane;GO:0043005//neuron projection;GO:0044297//cell body	GO:0005488//binding	GO:0006935//chemotaxis;GO:0007166//cell surface receptor signaling pathway;GO:0010033//response to organic substance;GO:0045597//positive regulation of cell differentiation;GO:0045661//regulation of myoblast differentiation;GO:0071842	gi|15147240|ref|NP_150279.1|/0/1
51090	1514	171	46	11.91	3.12	-1.93256	Down	5.21214e-19	1.69539e-17	PLLP	plasmolipin	-	GO:0031224//intrinsic to membrane;GO:0043209//myelin sheath	GO:0015075//ion transmembrane transporter activity	GO:0006811//ion transport;GO:0006950//response to stress;GO:0008366//axon ensheathment	gi|7705755|ref|NP_057077.1|/6.93577e-86/1
10891	6318	133	36	2.17	0.57	-1.92866	Down	5.07712e-15	1.30461e-13	PPARGC1A	peroxisome proliferator-activated receptor gamma, coactivator 1 alpha	K07202	GO:0016591//DNA-directed RNA polymerase II, holoenzyme;GO:0044444//cytoplasmic part	GO:0003676//nucleic acid binding;GO:0003713//transcription coactivator activity;GO:0016251//general RNA polymerase II transcription factor activity;GO:0035258//steroid hormone receptor binding	GO:0006094//gluconeogenesis;GO:0006352//DNA-dependent transcription, initiation;GO:0006396//RNA processing;GO:0006950//response to stress;GO:0008219//cell death;GO:0010551;GO:0014823//response to activity;GO:0015980//energy derivation by oxidation of organic compounds;GO:0016573//histone acetylation;GO:0022900//electron transport chain;GO:0030518//intracellular steroid hormone receptor signaling …	gi|7019499|ref|NP_037393.1|/0/1
4915	7073.63	140	39	2.05	0.55	-1.89812	Down	2.52378e-15	6.69496e-14	NTRK2	neurotrophic tyrosine kinase, receptor, type 2	K04360	GO:0016021//integral to membrane	GO:0004713//protein tyrosine kinase activity;GO:0004872//receptor activity;GO:0019838//growth factor binding;GO:0032559	GO:0006464//cellular protein modification process;GO:0007169//transmembrane receptor protein tyrosine kinase signaling pathway;GO:0045762//positive regulation of adenylate cyclase activity;GO:0048731;GO:0048869//cellular developmental process	gi|65506745|ref|NP_001018074.1|/0/1
652968	1644	54	15	3.46	0.94	-1.88004	Down	9.86386e-07	1.09707e-05	GATSL3	GATS protein-like 3	-	-	-	-	gi|83415181|ref|NP_001032755.1|/2.94558e-178/1
55504	4214	43	12	1.06	0.29	-1.86994	Down	1.37952e-05	0.000126204	TNFRSF19	tumor necrosis factor receptor superfamily, member 19	K05155	GO:0031224//intrinsic to membrane;GO:0043231//intracellular membrane-bounded organelle	GO:0005035//death receptor activity;GO:0005488//binding	GO:0000165//MAPK cascade;GO:0007249//I-kappaB kinase/NF-kappaB cascade;GO:0008544//epidermis development;GO:0012502//induction of programmed cell death;GO:0019221//cytokine-mediated signaling pathway	gi|23238204|ref|NP_683760.1|/0/1
525	1956	85	24	4.55	1.25	-1.86394	Down	1.00709e-09	1.64281e-08	ATP6V1B1	ATPase, H+ transporting, lysosomal 56/58kDa, V1 subunit B1	K02147	GO:0005774//vacuolar membrane;GO:0033176;GO:0042995//cell projection;GO:0044459//plasma membrane part	GO:0015078//hydrogen ion transmembrane transporter activity;GO:0019829//cation-transporting ATPase activity;GO:0032559	GO:0006875//cellular metal ion homeostasis;GO:0006885//regulation of pH;GO:0007169//transmembrane receptor protein tyrosine kinase signaling pathway;GO:0015031//protein transport;GO:0015986//ATP synthesis coupled proton transport;GO:0015988//energy coupled proton transmembrane transport, against electrochemical gradient;GO:0042471//ear morphogenesis;GO:0050954//sensory perception of mechanical st…	gi|19913426|ref|NP_001683.2|/0/1
79957	2132.13	165	48	8.27	2.29	-1.85254	Down	4.5376e-17	1.34035e-15	PAQR6	progestin and adipoQ receptor family member VI	K07297	GO:0031224//intrinsic to membrane	GO:0004871//signal transducer activity	GO:0032501//multicellular organismal process;GO:0032502//developmental process	gi|442796411|ref|NP_001259034.1|/0/1
51702	3189	218	62	7.09	1.97	-1.84759	Down	1.39176e-22	5.48475e-21	PADI3	peptidyl arginine deiminase, type III	K01481	GO:0044424//intracellular part	GO:0016813//hydrolase activity, acting on carbon-nitrogen (but not peptide) bonds, in linear amidines;GO:0046872//metal ion binding	GO:0018195//peptidyl-arginine modification	gi|122939161|ref|NP_057317.2|/0/1
7433	2808	184	54	6.97	1.95	-1.83768	Down	1.06221e-18	3.42119e-17	VIPR1	vasoactive intestinal peptide receptor 1	K04589	GO:0016021//integral to membrane	GO:0004930//G-protein coupled receptor activity	GO:0002376//immune system process;GO:0003012//muscle system process;GO:0007186//G-protein coupled receptor signaling pathway;GO:0007267//cell-cell signaling;GO:0008283//cell proliferation	gi|353523869|ref|NP_001238814.1|/0/1
122953	3793	97	28	2.61	0.74	-1.81845	Down	1.09501e-10	1.95764e-09	JDP2	Jun dimerization protein 2	K09033	-	-	-	gi|395827851|ref|XP_003787106.1|/5.01703e-79/1
4804	3420	1484	439	44.99	12.97	-1.79443	Down	3.88382e-138	1.09778e-135	NGFR	nerve growth factor receptor	K02583	GO:0016021//integral to membrane;GO:0031981//nuclear lumen;GO:0044444//cytoplasmic part	GO:0004888//transmembrane signaling receptor activity;GO:0043121//neurotrophin binding	GO:0001942//hair follicle development;GO:0006917//induction of apoptosis;GO:0006935//chemotaxis;GO:0006950//response to stress;GO:0007399//nervous system development;GO:0008284//positive regulation of cell proliferation;GO:0008543//fibroblast growth factor receptor signaling pathway;GO:0009266//response to temperature stimulus;GO:0010467//gene expression;GO:0010769//regulation of cell morphogenes…	gi|345805210|ref|XP_548191.3|/0/1
827	3604	114	34	3.28	0.95	-1.7877	Down	6.15308e-12	1.2362e-10	CAPN6	calpain 6	K08575	GO:0015630//microtubule cytoskeleton;GO:0044444//cytoplasmic part	GO:0004197//cysteine-type endopeptidase activity;GO:0015631//tubulin binding	GO:0019538//protein metabolic process;GO:0033043//regulation of organelle organization	gi|13186316|ref|NP_055104.2|/0/1
1356	4348.14	664	191	15.21	4.43	-1.77964	Down	1.01597e-64	1.21576e-62	CP	ceruloplasmin (ferroxidase)	K13624	GO:0044421//extracellular region part	GO:0005515//protein binding;GO:0016724;GO:0046914//transition metal ion binding	GO:0000041//transition metal ion transport;GO:0006810//transport;GO:0006875//cellular metal ion homeostasis;GO:0008152//metabolic process	gi|4557485|ref|NP_000087.1|/0/1
6097	3054	40	12	1.36	0.4	-1.76553	Down	5.6041e-05	0.000446639	RORC	RAR-related orphan receptor C	K08534	GO:0031981//nuclear lumen	GO:0001071//nucleic acid binding transcription factor activity;GO:0003677//DNA binding;GO:0004879//ligand-activated sequence-specific DNA binding RNA polymerase II transcription factor activity;GO:0046914//transition metal ion binding	GO:0006464//cellular protein modification process;GO:0009755//hormone-mediated signaling pathway;GO:0010551;GO:0030217//T cell differentiation;GO:0048511//rhythmic process	gi|758420|gb|AAA64751.1|/0/1
9518	1220	651	197	56.72	16.71	-1.76315	Down	4.1886e-60	4.67129e-58	GDF15	growth differentiation factor 15	K05504	GO:0044421//extracellular region part	GO:0005102//receptor binding	GO:0007154//cell communication;GO:0007178//transmembrane receptor protein serine/threonine kinase signaling pathway	gi|153792495|ref|NP_004855.2|/1.32625e-166/1
3398	1402	108	33	8.15	2.42	-1.75179	Down	4.12634e-11	7.66975e-10	ID2	inhibitor of DNA binding 2, dominant negative helix-loop-helix protein	K04680	GO:0031981//nuclear lumen;GO:0032991//macromolecular complex;GO:0044427//chromosomal part;GO:0044444//cytoplasmic part	GO:0030528//transcription regulator activity;GO:0046983//protein dimerization activity	GO:0001822//kidney development;GO:0002763//positive regulation of myeloid leukocyte differentiation;GO:0003164;GO:0006357//regulation of transcription from RNA polymerase II promoter;GO:0006629//lipid metabolic process;GO:0008285//negative regulation of cell proliferation;GO:0009605//response to external stimulus;GO:0010033//response to organic substance;GO:0010226//response to lithium ion;GO:002…	gi|402890033|ref|XP_003908298.1|/7.43285e-79/1
64288	2867.47	41	13	1.54	0.46	-1.74322	Down	7.78494e-05	0.00060116	ZSCAN31	zinc finger and SCAN domain containing 31	K09230	GO:0043231//intracellular membrane-bounded organelle	GO:0001071//nucleic acid binding transcription factor activity;GO:0003676//nucleic acid binding;GO:0046914//transition metal ion binding	GO:0006351//transcription, DNA-dependent	gi|206725430|ref|NP_001128688.1|/2.45583e-164/1
5087	6896.33	390	134	6.43	1.95	-1.72134	Down	1.34234e-31	7.35996e-30	PBX1	pre-B-cell leukemia homeobox 1	K09355	GO:0031981//nuclear lumen;GO:0043234//protein complex	GO:0001071//nucleic acid binding transcription factor activity;GO:0003677//DNA binding;GO:0046983//protein dimerization activity	GO:0001501//skeletal system development;GO:0001503//ossification;GO:0003002//regionalization;GO:0003006//developmental process involved in reproduction;GO:0006357//regulation of transcription from RNA polymerase II promoter;GO:0008202//steroid metabolic process;GO:0008283//cell proliferation;GO:0009887//organ morphogenesis;GO:0030097//hemopoiesis;GO:0035108//limb morphogenesis;GO:0035270//endocri…	gi|74006104|ref|XP_545786.2|/0/1
22925	5567.14	45	14	0.82	0.25	-1.7137	Down	2.78648e-05	0.000237677	PLA2R1	phospholipase A2 receptor 1, 180kDa	K06560	GO:0016021//integral to membrane;GO:0044421//extracellular region part	GO:0004871//signal transducer activity;GO:0030246//carbohydrate binding	GO:0016192//vesicle-mediated transport	gi|55953106|ref|NP_001007268.1|/0/1
114907	6770.48	1227	383	18.63	5.68	-1.71366	Down	8.6192e-108	1.9095e-105	FBXO32	F-box protein 32	K10305	-	-	-	gi|72679811|gb|AAI00021.1|/7.14194e-150/1
57822	2879	189	62	7.09	2.18	-1.70146	Down	5.31272e-17	1.56649e-15	GRHL3	grainyhead-like 3 (Drosophila)	K09275	GO:0043231//intracellular membrane-bounded organelle	GO:0003676//nucleic acid binding	GO:0030036//actin cytoskeleton organization	gi|38049009|ref|NP_937816.1|/0/1
604	3375.35	813	250	24.19	7.48	-1.6933	Down	2.75798e-73	3.70609e-71	BCL6	B-cell CLL/lymphoma 6	K15618	GO:0031981//nuclear lumen;GO:0044427//chromosomal part	GO:0001071//nucleic acid binding transcription factor activity;GO:0003677//DNA binding;GO:0003682//chromatin binding;GO:0030528//transcription regulator activity;GO:0046914//transition metal ion binding	GO:0001783//B cell apoptotic process;GO:0001952//regulation of cell-matrix adhesion;GO:0002467//germinal center formation;GO:0002682//regulation of immune system process;GO:0002719;GO:0002828//regulation of type 2 immune response;GO:0006357//regulation of transcription from RNA polymerase II promoter;GO:0006606//protein import into nucleus;GO:0007010//cytoskeleton organization;GO:0007090//regulat…	gi|21040324|ref|NP_001697.2|/0/1
57718	3868	65	28	2.34	0.73	-1.68054	Down	6.73752e-05	0.000527735	PPP4R4	protein phosphatase 4, regulatory subunit 4	K15426	GO:0043234//protein complex;GO:0044424//intracellular part	GO:0005488//binding	-	gi|17402884|ref|NP_066009.2|/7.55138e-62/1
5164	1802.57	161	51	9.24	2.89	-1.67682	Down	2.80806e-15	7.40118e-14	PDK2	pyruvate dehydrogenase kinase, isozyme 2	K00898	GO:0031981//nuclear lumen;GO:0043234//protein complex;GO:0044429//mitochondrial part	GO:0004673//protein histidine kinase activity;GO:0032559;GO:0042802//identical protein binding;GO:0046983//protein dimerization activity	GO:0006086//acetyl-CoA biosynthetic process from pyruvate;GO:0006468//protein phosphorylation;GO:0007165//signal transduction;GO:0019318//hexose metabolic process	gi|90108887|pdb|2BTZ|A/0/1
158228	1741	59	19	3.56	1.12	-1.66838	Down	2.46568e-06	2.54389e-05	FAM201A	family with sequence similarity 201, member A	-	-	-	-	gi|74744050|sp|Q5SY85.1|F201A_HUMAN/7.82669e-68/1
1959	2809	59	18	2.05	0.65	-1.65711	Down	1.1464e-06	1.26304e-05	EGR2	early growth response 2	K12496	GO:0043231//intracellular membrane-bounded organelle	GO:0001071//nucleic acid binding transcription factor activity;GO:0001085//RNA polymerase II transcription factor binding;GO:0003676//nucleic acid binding;GO:0019899//enzyme binding;GO:0046872//metal ion binding	GO:0006355//regulation of transcription, DNA-dependent;GO:0006366//transcription from RNA polymerase II promoter;GO:0007422//peripheral nervous system development;GO:0007610//behavior;GO:0019226//transmission of nerve impulse;GO:0021594//rhombomere formation;GO:0022008//neurogenesis;GO:0042221//response to chemical stimulus;GO:0051239;GO:0065008	gi|426364870|ref|XP_004049515.1|/0/1
57507	5645	193	63	3.53	1.12	-1.65617	Down	1.98785e-17	5.96865e-16	ZNF608	zinc finger protein 608	K10847	-	GO:0046872//metal ion binding	-	gi|20521822|dbj|BAA86595.2|/0/1
9938	2900	146	48	5.23	1.68	-1.63835	Down	1.98999e-13	4.54372e-12	ARHGAP25	Rho GTPase activating protein 25	K08878;K07526;K12490	GO:0044444//cytoplasmic part	-	GO:0009966//regulation of signal transduction;GO:0035556//intracellular signal transduction	gi|40789060|dbj|BAA06125.2|/0/1
27113	1845.76	49	18	3.09	1	-1.62761	Down	8.60404e-05	0.000657597	BBC3	BCL2 binding component 3	K10132	GO:0031966//mitochondrial membrane	GO:0005488//binding;GO:0019904//protein domain specific binding	GO:0001836//release of cytochrome c from mitochondria;GO:0007417//central nervous system development;GO:0008630//intrinsic apoptotic signaling pathway in response to DNA damage;GO:0010259//multicellular organismal aging;GO:0030154//cell differentiation;GO:0032461//positive regulation of protein oligomerization;GO:0040008//regulation of growth;GO:0070234//positive regulation of T cell apoptotic pr…	gi|395854225|ref|XP_003799598.1|/3.17806e-67/1
223075	3959.64	71	23	1.82	0.59	-1.62515	Down	2.5258e-07	3.10871e-06	CCDC129	coiled-coil domain containing 129	K08067	-	-	-	gi|384081587|ref|NP_001244897.1|/0/1
342667	3293	118.28	39.75	3.73	1.22	-1.61229	Down	4.69312e-11	8.63513e-10	STAC2	SH3 and cysteine rich domain 2	K11447;K00939;K00591	-	GO:0043169//cation binding	GO:0007165//signal transduction	gi|39752673|ref|NP_945344.1|/0/1
10161	2512	180	61	7.47	2.47	-1.5966	Down	1.16977e-15	3.18559e-14	LPAR6	lysophosphatidic acid receptor 6	K04273	GO:0031224//intrinsic to membrane	GO:0001608	GO:0035588	gi|332841287|ref|XP_001151721.2|/0/1
83667	3547	455	155	13.29	4.41	-1.59149	Down	5.423e-37	3.55619e-35	SESN2	sestrin 2	K10141	GO:0043231//intracellular membrane-bounded organelle	-	GO:0022402//cell cycle process	gi|13899299|ref|NP_113647.1|/0/1
11178	5459	46	16	0.87	0.29	-1.58496	Down	7.80568e-05	0.000602478	LZTS1	leucine zipper, putative tumor suppressor 1	K11447;K08857;K00939;K11504	GO:0030425//dendrite;GO:0031981//nuclear lumen;GO:0044430//cytoskeletal part;GO:0044459//plasma membrane part	GO:0001071//nucleic acid binding transcription factor activity;GO:0003676//nucleic acid binding	GO:0006353//DNA-dependent transcription, termination;GO:0006354//DNA-dependent transcription, elongation;GO:0010769//regulation of cell morphogenesis involved in differentiation;GO:0050804//regulation of synaptic transmission	gi|4572464|gb|AAD23834.1|AF123653_1/0/1
55076	1564	740	255	49.86	16.74	-1.57458	Down	3.11396e-58	3.31495e-56	TMEM45A	transmembrane protein 45A	-	GO:0031224//intrinsic to membrane	-	-	gi|119600225|gb|EAW79819.1|/2.15484e-130/1
79924	4045	115.34	39.19	2.91	0.98	-1.57017	Down	1.67455e-10	2.94556e-09	ADM2	adrenomedullin 2	K11447;K00939;K00469	-	GO:0005102//receptor binding	-	gi|47678489|emb|CAG30365.1|/9.03797e-138/1
55890	1956.72	46	16	2.46	0.83	-1.56748	Down	7.80568e-05	0.000602194	GPRC5C	G protein-coupled receptor, family C, group 5, member C	K04620	GO:0012506//vesicle membrane;GO:0016021//integral to membrane;GO:0043231//intracellular membrane-bounded organelle	GO:0004888//transmembrane signaling receptor activity;GO:0005488//binding	GO:0007166//cell surface receptor signaling pathway	gi|40217833|ref|NP_061123.3|/0/1
7008	4398.01	67	23	1.57	0.53	-1.5667	Down	1.40726e-06	1.52181e-05	TEF	thyrotrophic embryonic factor	K09058	GO:0043231//intracellular membrane-bounded organelle	GO:0001071//nucleic acid binding transcription factor activity;GO:0003677//DNA binding;GO:0030528//transcription regulator activity;GO:0042802//identical protein binding;GO:0043566//structure-specific DNA binding;GO:0046983//protein dimerization activity	GO:0006357//regulation of transcription from RNA polymerase II promoter	gi|466057076|ref|XP_004279575.1|/1.5459e-124/1
5618	11277.8	154	53	1.38	0.47	-1.55394	Down	2.32742e-13	5.28473e-12	PRLR	prolactin receptor	K05081	GO:0031224//intrinsic to membrane	GO:0004896//cytokine receptor activity;GO:0008047//enzyme activator activity;GO:0019900//kinase binding;GO:0042277//peptide binding;GO:0042802//identical protein binding;GO:0043169//cation binding	GO:0003006//developmental process involved in reproduction;GO:0007155//cell adhesion;GO:0007169//transmembrane receptor protein tyrosine kinase signaling pathway;GO:0007275//multicellular organismal development;GO:0007589//body fluid secretion;GO:0008202//steroid metabolic process;GO:0030855//epithelial cell differentiation;GO:0042976//activation of Janus kinase activity;GO:0043066//negative regu…	gi|4506107|ref|NP_000940.1|/0/1
256691	3618	88	31	2.52	0.87	-1.53434	Down	5.2864e-08	7.06894e-07	MAMDC2	MAM domain containing 2	K08606	GO:0005578//proteinaceous extracellular matrix;GO:0043231//intracellular membrane-bounded organelle	GO:0030247//polysaccharide binding	GO:0018149//peptide cross-linking	gi|223278413|ref|NP_694999.3|/0/1
26471	888.09	331	119	40.3	14.07	-1.51816	Down	1.58349e-25	7.01614e-24	NUPR1	nuclear protein, transcriptional regulator, 1	K15626	GO:0043231//intracellular membrane-bounded organelle	-	GO:0009987//cellular process;GO:0012502//induction of programmed cell death;GO:0040007//growth;GO:0065007//biological regulation	gi|402908136|ref|XP_003916810.1|/6.91615e-17/1
29903	1993	77	28	4.05	1.43	-1.50191	Down	6.5413e-07	7.49917e-06	CCDC106	coiled-coil domain containing 106	-	GO:0043231//intracellular membrane-bounded organelle	-	-	gi|94536856|ref|NP_037433.2|/1.03226e-135/1
2568	3310	157	57	4.92	1.74	-1.49957	Down	9.91646e-13	2.14473e-11	GABRP	gamma-aminobutyric acid (GABA) A receptor, pi	K05189	GO:0034702//ion channel complex;GO:0044459//plasma membrane part	GO:0005253//anion channel activity;GO:0015276//ligand-gated ion channel activity;GO:0016917//GABA receptor activity	GO:0006810//transport	gi|403290182|ref|XP_003936209.1|/0/1
467	2072.61	76	28	3.89	1.38	-1.4951	Down	9.81078e-07	1.09339e-05	ATF3	activating transcription factor 3	K09032	GO:0031981//nuclear lumen;GO:0043234//protein complex	GO:0001071//nucleic acid binding transcription factor activity;GO:0003677//DNA binding;GO:0003712//transcription cofactor activity;GO:0005515//protein binding;GO:0030528//transcription regulator activity	GO:0006006//glucose metabolic process;GO:0006351//transcription, DNA-dependent;GO:0008283//cell proliferation	gi|397486218|ref|XP_003814228.1|/9.6543e-93/1
419	1563	60	22	4.05	1.44	-1.49185	Down	1.31145e-05	0.000120516	ART3	ADP-ribosyltransferase 3	K00775	GO:0016021//integral to membrane	GO:0016763//transferase activity, transferring pentosyl groups	GO:0006464//cellular protein modification process	gi|21361167|ref|NP_001170.2|/0/1
10451	3404.33	112	44	3.67	1.31	-1.48621	Down	1.427e-08	2.06663e-07	VAV3	vav 3 guanine nucleotide exchange factor	K05730	GO:0016020//membrane;GO:0044444//cytoplasmic part	GO:0005089//Rho guanyl-nucleotide exchange factor activity;GO:0008047//enzyme activator activity;GO:0030674//protein binding, bridging;GO:0043169//cation binding;GO:0070851//growth factor receptor binding	GO:0006917//induction of apoptosis;GO:0007169//transmembrane receptor protein tyrosine kinase signaling pathway;GO:0007266//Rho protein signal transduction;GO:0007599//hemostasis;GO:0009966//regulation of signal transduction;GO:0016192//vesicle-mediated transport;GO:0030031//cell projection assembly;GO:0030155//regulation of cell adhesion;GO:0030888//regulation of B cell proliferation;GO:0033124/…	gi|120432044|ref|NP_006104.4|/0/1
8614	5361	2446	899	47.07	16.86	-1.4812	Down	3.40436e-172	1.29793e-169	STC2	stanniocalcin 2	-	-	GO:0005102//receptor binding	GO:0001666//response to hypoxia;GO:0003006//developmental process involved in reproduction;GO:0007154//cell communication;GO:0007165//signal transduction;GO:0007275//multicellular organismal development;GO:0009725//response to hormone stimulus;GO:0033273//response to vitamin	gi|4507267|ref|NP_003705.1|/6.69743e-178/1
10396	8225	71	26	0.89	0.32	-1.47573	Down	2.02892e-06	2.12946e-05	ATP8A1	ATPase, aminophospholipid transporter (APLT), class I, type 8A, member 1	K14802	GO:0030667//secretory granule membrane;GO:0031224//intrinsic to membrane	GO:0005548//phospholipid transporter activity;GO:0008324//cation transmembrane transporter activity;GO:0032559;GO:0042625//ATPase activity, coupled to transmembrane movement of ions;GO:0046872//metal ion binding	GO:0006811//ion transport;GO:0006869//lipid transport;GO:0009206;GO:0009207	gi|62088954|dbj|BAD92924.1|/0/1
5104	2352	211	78	9.36	3.37	-1.47376	Down	3.18232e-16	8.97951e-15	SERPINA5	serpin peptidase inhibitor, clade A (alpha-1 antiproteinase, antitrypsin), member 5	K03913	GO:0032991//macromolecular complex;GO:0044464//cell part	GO:0004866//endopeptidase inhibitor activity;GO:0005539//glycosaminoglycan binding;GO:0019899//enzyme binding	GO:0006508//proteolysis;GO:0007338//single fertilization;GO:0010466//negative regulation of peptidase activity;GO:0048232//male gamete generation	gi|194018472|ref|NP_000615.3|/0/1
1491	2140	92	34	4.49	1.62	-1.47072	Down	7.4809e-08	9.85075e-07	CTH	cystathionase (cystathionine gamma-lyase)	K01758	GO:0043231//intracellular membrane-bounded organelle	GO:0016846//carbon-sulfur lyase activity;GO:0048037//cofactor binding	GO:0000097//sulfur amino acid biosynthetic process;GO:0008283//cell proliferation;GO:0016049//cell growth;GO:0018205//peptidyl-lysine modification;GO:0051260//protein homooligomerization	gi|299473759|ref|NP_001177392.1|/0/1
4814	1297	919	342	75.14	27.23	-1.46438	Down	1.04552e-64	1.24205e-62	NINJ1	ninjurin 1	-	GO:0016020//membrane	-	GO:0048731	gi|148922911|ref|NP_004139.2|/8.4189e-58/1
64147	3345.96	52	20	1.65	0.6	-1.45943	Down	9.18576e-05	0.000695893	KIF9	kinesin family member 9	K10397	GO:0015630//microtubule cytoskeleton	GO:0003774//motor activity;GO:0032559	GO:0007017//microtubule-based process;GO:0007599//hemostasis	gi|199560791|ref|NP_878905.2|/0/1
25928	1883	88	33	4.9	1.79	-1.45282	Down	1.95508e-07	2.4411e-06	SOSTDC1	sclerostin domain containing 1	-	GO:0044421//extracellular region part	-	GO:0030509//BMP signaling pathway;GO:0042476//odontogenesis	gi|426355540|ref|XP_004045175.1|/1.22615e-114/1
196996	3318	56	21	1.75	0.64	-1.45121	Down	3.4794e-05	0.000291324	GRAMD2	GRAM domain containing 2	-	GO:0031224//intrinsic to membrane	-	-	gi|23512334|gb|AAH38451.1|/0/1
26018	4812	601	227	12.9	4.75	-1.44137	Down	5.14326e-42	3.88565e-40	LRIG1	leucine-rich repeats and immunoglobulin-like domains 1	K06753	GO:0031224//intrinsic to membrane	-	-	gi|119585856|gb|EAW65452.1|/0/1
26298	5463.89	1131	428	21.37	7.87	-1.44115	Down	2.62484e-77	3.67792e-75	EHF	ets homologous factor	K09429	GO:0043231//intracellular membrane-bounded organelle	GO:0001071//nucleic acid binding transcription factor activity;GO:0003677//DNA binding	GO:0006355//regulation of transcription, DNA-dependent;GO:0030154//cell differentiation;GO:0032501//multicellular organismal process	gi|331028760|ref|NP_001193545.1|/0/1
84152	1503.32	778	294	54.31	20.1	-1.43402	Down	7.60862e-54	7.5142e-52	PPP1R1B	protein phosphatase 1, regulatory (inhibitor) subunit 1B	K15494	GO:0043231//intracellular membrane-bounded organelle;GO:0044444//cytoplasmic part	GO:0004864//protein phosphatase inhibitor activity;GO:0005515//protein binding;GO:0019212//phosphatase inhibitor activity;GO:0019887//protein kinase regulator activity	GO:0007165//signal transduction;GO:0007632//visual behavior;GO:0010467//gene expression;GO:0014075//response to amine stimulus;GO:0023052//signaling;GO:0045924//regulation of female receptivity	gi|21735492|ref|NP_115568.2|/5.17508e-67/1
6536	3247.01	164	64	5.36	1.99	-1.42946	Down	4.99602e-12	1.01367e-10	SLC6A9	solute carrier family 6 (neurotransmitter transporter, glycine), member 9	K05038	GO:0005626//insoluble fraction;GO:0016021//integral to membrane	GO:0005283//sodium:amino acid symporter activity;GO:0005326//neurotransmitter transporter activity;GO:0005488//binding;GO:0015175//neutral amino acid transmembrane transporter activity	GO:0015804//neutral amino acid transport;GO:0015837//amine transport	gi|67782317|ref|NP_001020016.1|/0/1
90293	3438.43	81	32	2.53	0.94	-1.4284	Down	1.63694e-06	1.746e-05	KLHL13	kelch-like family member 13	K10447	GO:0031461//cullin-RING ubiquitin ligase complex	GO:0019787//small conjugating protein ligase activity	GO:0000087//M phase of mitotic cell cycle;GO:0032446//protein modification by small protein conjugation	gi|45643138|ref|NP_277030.2|/0/1
5175	6831	1411.63	538.27	21.28	7.91	-1.42775	Down	6.42634e-95	1.1972e-92	PECAM1	platelet/endothelial cell adhesion molecule 1	K06471	GO:0030667//secretory granule membrane;GO:0031224//intrinsic to membrane;GO:0044421//extracellular region part;GO:0044459//plasma membrane part	GO:0005488//binding	GO:0001775//cell activation;GO:0006887//exocytosis;GO:0006897//endocytosis;GO:0007599//hemostasis;GO:0023052//signaling;GO:0050900//leukocyte migration	gi|313760624|ref|NP_000433.4|/0/1
875	2609	124	48	5.03	1.87	-1.42752	Down	1.56119e-09	2.50187e-08	CBS	cystathionine-beta-synthase	K01697	GO:0000267//cell fraction;GO:0031981//nuclear lumen;GO:0044444//cytoplasmic part	GO:0005506//iron ion binding;GO:0016836//hydro-lyase activity;GO:0019899//enzyme binding;GO:0042802//identical protein binding;GO:0048037//cofactor binding	GO:0001101//response to acid;GO:0001503//ossification;GO:0006563//L-serine metabolic process;GO:0009093//cysteine catabolic process;GO:0009991//response to extracellular stimulus;GO:0019344//cysteine biosynthetic process;GO:0043405//regulation of MAP kinase activity	gi|4557415|ref|NP_000062.1|/0/1
143686	9345	80	31	0.87	0.33	-1.39855	Down	1.31916e-06	1.43887e-05	SESN3	sestrin 3	K10141	GO:0043231//intracellular membrane-bounded organelle	-	GO:0022402//cell cycle process	gi|410972421|ref|XP_003992658.1|/0/1
152573	1971	54	21	2.87	1.09	-1.39672	Down	7.72172e-05	0.000597122	SHISA3	shisa homolog 3 (Xenopus laevis)	-	GO:0031090//organelle membrane;GO:0031224//intrinsic to membrane;GO:0043231//intracellular membrane-bounded organelle	-	GO:0032501//multicellular organismal process	gi|122937450|ref|NP_001073974.1|/1.48626e-110/1
357	7445	104	41	1.44	0.55	-1.38857	Down	5.11778e-08	6.87712e-07	SHROOM2	shroom family member 2	K05868;K00901;K13172	GO:0005884//actin filament;GO:0015630//microtubule cytoskeleton;GO:0043296//apical junction complex;GO:0044297//cell body;GO:0044444//cytoplasmic part	GO:0003779//actin binding;GO:0005272//sodium channel activity	GO:0002088//lens development in camera-type eye;GO:0007417//central nervous system development;GO:0008105//asymmetric protein localization;GO:0030042//actin filament depolymerization;GO:0032400//melanosome localization;GO:0032989;GO:0034331;GO:0048592//eye morphogenesis;GO:0048753//pigment granule organization;GO:0048870//cell motility	gi|4502175|ref|NP_001640.1|/0/1
9635	4043	379	149	9.7	3.72	-1.38268	Down	1.43632e-25	6.39867e-24	CLCA2	chloride channel accessory 2	K05028	GO:0016021//integral to membrane;GO:0016323//basolateral plasma membrane	GO:0005253//anion channel activity	GO:0009987//cellular process;GO:0015698//inorganic anion transport	gi|5729769|ref|NP_006527.1|/0/1
29116	3086	65	26	2.19	0.85	-1.3654	Down	2.17412e-05	0.000189992	MYLIP	myosin regulatory light chain interacting protein	K10637	GO:0043232;GO:0044425//membrane part	GO:0005515//protein binding;GO:0019787//small conjugating protein ligase activity;GO:0046914//transition metal ion binding	GO:0009896;GO:0010985;GO:0016567//protein ubiquitination;GO:0031329;GO:0031647//regulation of protein stability;GO:0048731;GO:0055092//sterol homeostasis	gi|38788243|ref|NP_037394.2|/0/1
56925	1132	692	278	65.17	25.49	-1.35428	Down	7.74148e-44	6.1311e-42	LXN	latexin	-	GO:0044424//intracellular part	GO:0004866//endopeptidase inhibitor activity;GO:0005488//binding	GO:0019222//regulation of metabolic process;GO:0050961//detection of temperature stimulus involved in sensory perception	gi|194473714|ref|NP_064554.3|/2.96156e-125/1
5918	1460.06	1450	575	102.66	40.51	-1.34152	Down	8.66056e-92	1.57757e-89	RARRES1	retinoic acid receptor responder (tazarotene induced) 1	-	GO:0031224//intrinsic to membrane	-	GO:0008283//cell proliferation	gi|119599082|gb|EAW78676.1|/2.556e-112/1
8991	1660.86	66	26	4.05	1.6	-1.33985	Down	1.47794e-05	0.00013416	SELENBP1	selenium binding protein 1	K01090	GO:0031981//nuclear lumen;GO:0044444//cytoplasmic part	GO:0005488//binding	GO:0006810//transport	gi|385137130|ref|NP_001245218.1|/0/1
23017	4744	68	28	1.48	0.59	-1.32681	Down	2.22276e-05	0.000193933	FAIM2	Fas apoptotic inhibitory molecule 2	K06890	GO:0031224//intrinsic to membrane;GO:0044459//plasma membrane part	-	GO:0007399//nervous system development;GO:0043066//negative regulation of apoptotic process	gi|355564213|gb|EHH20713.1|/0/1
283596	1507.99	74	32	5.42	2.18	-1.31396	Down	2.2284e-05	0.000194218	SNHG10	small nucleolar RNA host gene 10 (non-protein coding)	-	-	-	-	gi|119602011|gb|EAW81605.1|/5.07936e-42/1
6376	3304	63	26	1.98	0.8	-1.30743	Down	4.64914e-05	0.000378629	CX3CL1	chemokine (C-X3-C motif) ligand 1	K05508	GO:0031224//intrinsic to membrane;GO:0044421//extracellular region part	GO:0005125//cytokine activity	GO:0006915//apoptotic process;GO:0007166//cell surface receptor signaling pathway;GO:0009611//response to wounding;GO:0022409//positive regulation of cell-cell adhesion;GO:0030595//leukocyte chemotaxis;GO:0031349//positive regulation of defense response;GO:0032905;GO:0045321//leukocyte activation;GO:0045765//regulation of angiogenesis	gi|4506857|ref|NP_002987.1|/0/1
348926	3428	95.96	39.92	2.9	1.18	-1.29727	Down	4.7947e-07	5.62665e-06	FAM86EP	family with sequence similarity 86, member A pseudogene	K03842	-	-	-	gi|301778421|ref|XP_002924646.1|/1.94937e-87/1
3280	1475	904	378	64.71	26.35	-1.29619	Down	3.73752e-53	3.6472e-51	HES1	hairy and enhancer of split 1, (Drosophila)	K06054	GO:0032991//macromolecular complex;GO:0043231//intracellular membrane-bounded organelle	GO:0003700//sequence-specific DNA binding transcription factor activity;GO:0008134//transcription factor binding;GO:0010843;GO:0019899//enzyme binding;GO:0019904//protein domain specific binding;GO:0030528//transcription regulator activity;GO:0046983//protein dimerization activity	GO:0000122//negative regulation of transcription from RNA polymerase II promoter;GO:0000904//cell morphogenesis involved in differentiation;GO:0001756//somitogenesis;GO:0003264//regulation of cardioblast proliferation;GO:0003310//pancreatic A cell differentiation;GO:0009912//auditory receptor cell fate commitment;GO:0010551;GO:0019827//stem cell maintenance;GO:0021545//cranial nerve development;G…	gi|5031763|ref|NP_005515.1|/3.63707e-116/1
727897	17916	472	198	2.7	1.1	-1.29546	Down	2.1069e-28	1.05306e-26	MUC5B	mucin 5B, oligomeric mucus/gel-forming	K13908	-	GO:0005488//binding	-	gi|301172750|ref|NP_002449.2|/0/1
11247	1821	191	80	11.01	4.49	-1.29403	Down	2.03594e-12	4.3123e-11	NXPH4	neurexophilin 4	-	-	GO:0005515//protein binding	GO:0007186//G-protein coupled receptor signaling pathway	gi|39930315|ref|NP_009155.1|/2.43533e-128/1
26227	2021	1414	593	73.23	29.92	-1.29132	Down	1.01974e-81	1.50609e-79	PHGDH	phosphoglycerate dehydrogenase	K00058	-	GO:0000166//nucleotide binding;GO:0016616//oxidoreductase activity, acting on the CH-OH group of donors, NAD or NADP as acceptor	GO:0006563//L-serine metabolic process;GO:0006790//sulfur compound metabolic process;GO:0007049//cell cycle;GO:0007417//central nervous system development;GO:0009064//glutamine family amino acid metabolic process;GO:0009066//aspartate family amino acid metabolic process;GO:0010001//glial cell differentiation;GO:0010467//gene expression;GO:0030030//cell projection organization	gi|397469414|ref|XP_003806351.1|/0/1
2977	16140	104	43	0.66	0.27	-1.28951	Down	1.62605e-07	2.05374e-06	GUCY1A2	guanylate cyclase 1, soluble, alpha 2	K12318	GO:0044424//intracellular part	GO:0005506//iron ion binding;GO:0009975//cyclase activity;GO:0032561//guanyl ribonucleotide binding;GO:0046983//protein dimerization activity	GO:0001775//cell activation;GO:0006182//cGMP biosynthetic process;GO:0007165//signal transduction;GO:0007599//hemostasis	gi|4504211|ref|NP_000846.1|/0/1
402778	3721	157	66	4.37	1.79	-1.28767	Down	2.1211e-10	3.68361e-09	IFITM10	interferon induced transmembrane protein 10	K06566	GO:0031224//intrinsic to membrane	-	GO:0050896//response to stimulus	gi|334848153|ref|NP_001164291.2|/1.20731e-114/1
1052	1269	570	244	47.67	19.87	-1.26249	Down	7.92142e-33	4.49356e-31	CEBPD	CCAAT/enhancer binding protein (C/EBP), delta	K10050	GO:0043231//intracellular membrane-bounded organelle	GO:0003702//RNA polymerase II transcription factor activity;GO:0042802//identical protein binding;GO:0043565//sequence-specific DNA binding	GO:0006357//regulation of transcription from RNA polymerase II promoter;GO:0030154//cell differentiation	gi|395739652|ref|XP_002819109.2|/6.63119e-108/1
1836	8082	1510.37	651.04	19.22	8.08	-1.25018	Down	4.65506e-83	6.93773e-81	SLC26A2	solute carrier family 26 (sulfate transporter), member 2	K14701	GO:0005626//insoluble fraction;GO:0016021//integral to membrane	GO:0015103//inorganic anion transmembrane transporter activity;GO:0015291//secondary active transmembrane transporter activity	GO:0015698//inorganic anion transport;GO:0032501//multicellular organismal process	gi|100913030|ref|NP_000103.2|/0/1
5166	3710	178	77	4.97	2.09	-1.24974	Down	4.23536e-11	7.83685e-10	PDK4	pyruvate dehydrogenase kinase, isozyme 4	K00898	GO:0019866//organelle inner membrane;GO:0044429//mitochondrial part	GO:0004673//protein histidine kinase activity;GO:0032559	GO:0006086//acetyl-CoA biosynthetic process from pyruvate;GO:0006468//protein phosphorylation;GO:0019318//hexose metabolic process	gi|4505693|ref|NP_002603.1|/0/1
23648	2089.78	334	144	16.66	7.02	-1.24685	Down	1.17089e-19	3.98248e-18	SSBP3	single stranded DNA binding protein 3	-	-	GO:0043566//structure-specific DNA binding	-	gi|38372899|ref|NP_940840.1|/5.30957e-138/1
10170	1563.03	130	57	8.83	3.74	-1.23938	Down	2.65822e-08	3.68687e-07	DHRS9	dehydrogenase/reductase (SDR family) member 9	K11149	GO:0031227//intrinsic to endoplasmic reticulum membrane;GO:0042598	GO:0016853//isomerase activity;GO:0030283//testosterone dehydrogenase [NAD(P)] activity	GO:0001523//retinoid metabolic process;GO:0008207//C21-steroid hormone metabolic process;GO:0030154//cell differentiation;GO:0035238//vitamin A biosynthetic process	gi|426337613|ref|XP_004032795.1|/0/1
6280	586	497	217	94.1	39.96	-1.23564	Down	7.14898e-28	3.45724e-26	S100A9	S100 calcium binding protein A9	K10384	GO:0016020//membrane;GO:0031981//nuclear lumen;GO:0043232	GO:0046872//metal ion binding;GO:0060089	GO:0006952//defense response;GO:0007154//cell communication;GO:0010556;GO:0023052//signaling;GO:0030036//actin cytoskeleton organization;GO:0042221//response to chemical stimulus;GO:0050900//leukocyte migration	gi|297280058|ref|XP_001110408.2|/2.06195e-70/1
27134	3140	338	148	11.19	4.77	-1.23015	Down	2.30994e-19	7.69698e-18	TJP3	tight junction protein 3	K06097	GO:0043296//apical junction complex	GO:0005488//binding	-	gi|389565501|ref|NP_001254490.1|/0/1
222	2561.11	99	44	4.08	1.74	-1.22948	Down	1.68057e-06	1.78788e-05	ALDH3B2	aldehyde dehydrogenase 3 family, member B2	K00129	-	GO:0016620//oxidoreductase activity, acting on the aldehyde or oxo group of donors, NAD or NADP as acceptor	GO:0044237//cellular metabolic process;GO:0044238//primary metabolic process;GO:0044281//small molecule metabolic process	gi|397517162|ref|XP_003828788.1|/0/1
8869	2382.5	129	58	5.72	2.47	-1.2115	Down	6.26618e-08	8.30459e-07	ST3GAL5	ST3 beta-galactoside alpha-2,3-sialyltransferase 5	K03370	GO:0016021//integral to membrane;GO:0031228//intrinsic to Golgi membrane	GO:0008373//sialyltransferase activity	GO:0001573//ganglioside metabolic process;GO:0006464//cellular protein modification process	gi|109633046|ref|NP_001035902.1|/0/1
8224	3032.08	191	84	6.47	2.8	-1.20834	Down	1.69568e-11	3.28981e-10	SYN3	synapsin III	-	GO:0008021//synaptic vesicle;GO:0044459//plasma membrane part	GO:0003824//catalytic activity;GO:0032559	GO:0001505//regulation of neurotransmitter levels	gi|62088948|dbj|BAD92921.1|/0/1
5295	6618.69	1148	501	17.54	7.6	-1.20658	Down	3.1889e-62	3.70772e-60	PIK3R1	phosphoinositide-3-kinase, regulatory subunit 1 (alpha)	K02649	GO:0005624//membrane fraction;GO:0005942//phosphatidylinositol 3-kinase complex;GO:0016020//membrane;GO:0043231//intracellular membrane-bounded organelle	GO:0017046//peptide hormone binding;GO:0019900//kinase binding;GO:0019902//phosphatase binding;GO:0035004//phosphatidylinositol 3-kinase activity;GO:0035014//phosphatidylinositol 3-kinase regulator activity;GO:0035091//phosphatidylinositol binding;GO:0035258//steroid hormone receptor binding;GO:0070851//growth factor receptor binding	GO:0001101//response to acid;GO:0001932//regulation of protein phosphorylation;GO:0001952//regulation of cell-matrix adhesion;GO:0002027//regulation of heart rate;GO:0002762//negative regulation of myeloid leukocyte differentiation;GO:0006357//regulation of transcription from RNA polymerase II promoter;GO:0007162//negative regulation of cell adhesion;GO:0007169//transmembrane receptor protein tyr…	gi|32455252|ref|NP_852556.2|/0/1
770	1686	87	39	5.43	2.37	-1.19607	Down	8.58978e-06	8.11648e-05	CA11	carbonic anhydrase XI	K01672	GO:0044459//plasma membrane part	GO:0016836//hydro-lyase activity	-	gi|9951923|ref|NP_001208.2|/4.2509e-180/1
4638	3822.56	114	65	3.93	1.72	-1.19212	Down	0.000122376	0.000904118	MYLK	myosin light chain kinase	K00907	GO:0044444//cytoplasmic part	GO:0004674//protein serine/threonine kinase activity;GO:0008092//cytoskeletal protein binding;GO:0032559;GO:0043169//cation binding	GO:0003012//muscle system process;GO:0006464//cellular protein modification process;GO:0060415//muscle tissue morphogenesis	gi|78070392|gb|AAI07784.1|/1.16608e-116/1
79191	2308	538.12	243.12	24.33	10.71	-1.18378	Down	2.83332e-28	1.39908e-26	IRX3	iroquois homeobox 3	K15613	-	-	GO:0048856//anatomical structure development;GO:0050794//regulation of cellular process	gi|426382200|ref|XP_004057701.1|/9.72893e-141/1
10265	2078	377.88	170.88	19.02	8.38	-1.1825	Down	2.40548e-20	8.53581e-19	IRX5	iroquois homeobox 5	K15613	GO:0043231//intracellular membrane-bounded organelle	GO:0001071//nucleic acid binding transcription factor activity;GO:0003677//DNA binding;GO:0005496//steroid binding	GO:0006351//transcription, DNA-dependent;GO:0008016//regulation of heart contraction;GO:0030182//neuron differentiation;GO:0048469//cell maturation;GO:0050953//sensory perception of light stimulus	gi|356582257|ref|NP_001239126.1|/1.6746e-136/1
84924	5197	71.07	31.97	1.4	0.62	-1.17509	Down	3.84696e-05	0.000318521	ZNF566	zinc finger protein 566	K09228	GO:0043231//intracellular membrane-bounded organelle	GO:0003676//nucleic acid binding;GO:0046914//transition metal ion binding	GO:0006351//transcription, DNA-dependent	gi|223890210|ref|NP_001138815.1|/0/1
618	200	283	130	186.09	82.6	-1.17179	Down	3.81994e-15	9.98789e-14	BCYRN1	brain cytoplasmic RNA 1	-	-	-	-	gi|119581507|gb|EAW61103.1|/2.04997e-06/1
692312	3270	204.99	93.54	6.5	2.89	-1.16937	Down	1.80646e-11	3.49648e-10	PPAN-P2RY11	PPAN-P2RY11 readthrough	K14859	GO:0031981//nuclear lumen	GO:0005488//binding	GO:0006396//RNA processing	gi|99028871|ref|NP_001035754.1|/0/1
441376	1819	223.64	102.15	12.9	5.74	-1.16825	Down	2.46956e-12	5.19051e-11	AARD	alanine and arginine rich domain containing protein	K09228;K08857;K00939;K00797	-	-	GO:0030323//respiratory tube development	gi|70778889|ref|NP_001020528.1|/1.35504e-78/1
54828	3581	107	49	3.1	1.38	-1.1676	Down	1.31488e-06	1.43516e-05	BCAS3	breast carcinoma amplified sequence 3	-	GO:0043231//intracellular membrane-bounded organelle	-	-	gi|153218631|ref|NP_001092902.1|/0/1
1462	9637.82	209	105	2.44	1.09	-1.16255	Down	8.5416e-10	1.40031e-08	VCAN	versican	K06793	GO:0031012//extracellular matrix	GO:0005539//glycosaminoglycan binding;GO:0046872//metal ion binding;GO:0071813//lipoprotein particle binding	GO:0006950//response to stress;GO:0007409//axonogenesis;GO:0016477//cell migration;GO:0032501//multicellular organismal process;GO:0048513//organ development	gi|62088562|dbj|BAD92728.1|/0/1
2634	2595	87	40	3.49	1.56	-1.16168	Down	1.41696e-05	0.000129197	GBP2	guanylate binding protein 2, interferon-inducible	-	GO:0016020//membrane	GO:0017111//nucleoside-triphosphatase activity;GO:0032561//guanyl ribonucleotide binding	GO:0002376//immune system process;GO:0009207;GO:0019221//cytokine-mediated signaling pathway	gi|38327558|ref|NP_004111.2|/0/1
2752	4239.3	2249	1042	55.09	24.77	-1.1532	Down	3.1339e-107	6.76015e-105	GLUL	glutamate-ammonia ligase	K01915	GO:0043231//intracellular membrane-bounded organelle;GO:0044444//cytoplasmic part	GO:0005515//protein binding;GO:0016211;GO:0016831//carboxy-lyase activity;GO:0032559	GO:0001505//regulation of neurotransmitter levels;GO:0006541//glutamine metabolic process;GO:0009746	gi|444730513|gb|ELW70895.1|/0/1
9220	2110	72.19	33.3	3.58	1.61	-1.1529	Down	7.56016e-05	0.000586565	TIAF1	TGFB1-induced anti-apoptotic factor 1	K10362	GO:0015629//actin cytoskeleton;GO:0043231//intracellular membrane-bounded organelle;GO:0044444//cytoplasmic part	GO:0003676//nucleic acid binding;GO:0005515//protein binding;GO:0032559;GO:0042623//ATPase activity, coupled	GO:0007243//intracellular protein kinase cascade;GO:0043066//negative regulation of apoptotic process;GO:0044260	gi|17978509|ref|NP_004731.2|/4.03722e-53/1
128272	3044	110	51	3.75	1.7	-1.14136	Down	1.26556e-06	1.38502e-05	ARHGEF19	Rho guanine nucleotide exchange factor (GEF) 19	K07525	GO:0044464//cell part	GO:0005088//Ras guanyl-nucleotide exchange factor activity;GO:0008047//enzyme activator activity	GO:0007266//Rho protein signal transduction;GO:0030036//actin cytoskeleton organization	gi|40255149|ref|NP_694945.2|/0/1
53353	16557	121	56	0.75	0.34	-1.14136	Down	3.53676e-07	4.25085e-06	LRP1B	low density lipoprotein receptor-related protein 1B	K04550	GO:0005626//insoluble fraction;GO:0031224//intrinsic to membrane	GO:0004871//signal transducer activity;GO:0030169//low-density lipoprotein particle binding;GO:0046872//metal ion binding	GO:0006897//endocytosis;GO:0023052//signaling	gi|93102379|ref|NP_061027.2|/0/1
8503	5555.34	1397	646	25.69	11.69	-1.13593	Down	1.43684e-67	1.77109e-65	PIK3R3	phosphoinositide-3-kinase, regulatory subunit 3 (gamma)	K02649	GO:0043234//protein complex;GO:0044444//cytoplasmic part	GO:0005488//binding;GO:0035004//phosphatidylinositol 3-kinase activity;GO:0035014//phosphatidylinositol 3-kinase regulator activity	GO:0007169//transmembrane receptor protein tyrosine kinase signaling pathway;GO:0007599//hemostasis;GO:0031294	gi|197100572|ref|NP_001127243.1|/0/1
1545	5160	128	60	2.56	1.17	-1.12964	Down	2.32912e-07	2.88178e-06	CYP1B1	cytochrome P450, family 1, subfamily B, polypeptide 1	K07410	GO:0031090//organelle membrane;GO:0042598;GO:0043231//intracellular membrane-bounded organelle	GO:0005506//iron ion binding;GO:0016712//oxidoreductase activity, acting on paired donors, with incorporation or reduction of molecular oxygen, reduced flavin or flavoprotein as one donor, and incorporation of one atom of oxygen	GO:0008202//steroid metabolic process;GO:0019748//secondary metabolic process;GO:0042221//response to chemical stimulus;GO:0044237//cellular metabolic process;GO:0050953//sensory perception of light stimulus	gi|189491763|ref|NP_000095.2|/0/1
285590	7793	497	235	6.56	3.02	-1.11915	Down	4.48244e-24	1.86038e-22	SH3PXD2B	SH3 and PX domains 2B	K08011	GO:0015629//actin cytoskeleton;GO:0044459//plasma membrane part	GO:0019904//protein domain specific binding;GO:0035091//phosphatidylinositol binding	GO:0006461//protein complex assembly;GO:0007423//sensory organ development;GO:0009888//tissue development;GO:0045597//positive regulation of cell differentiation	gi|63055059|ref|NP_001017995.1|/0/1
2120	5989	730	345	12.56	5.79	-1.1172	Down	1.23677e-34	7.53742e-33	ETV6	ets variant 6	K03211	GO:0031981//nuclear lumen	GO:0001071//nucleic acid binding transcription factor activity;GO:0003677//DNA binding;GO:0005515//protein binding	GO:0006351//transcription, DNA-dependent;GO:0048869//cellular developmental process	gi|4503611|ref|NP_001978.1|/0/1
4604	3806.69	258	121	6.96	3.21	-1.11651	Down	2.00476e-13	4.56473e-12	MYBPC1	myosin binding protein C, slow type	K12557	GO:0016459//myosin complex;GO:0043292//contractile fiber	GO:0005198//structural molecule activity;GO:0008092//cytoskeletal protein binding	GO:0006936//muscle contraction;GO:0009987//cellular process	gi|46049125|ref|NP_996555.1|/0/1
284129	2864.31	88	42	3.23	1.49	-1.11622	Down	2.64462e-05	0.000226402	SLC26A11	solute carrier family 26, member 11	K14708	GO:0005764//lysosome;GO:0031224//intrinsic to membrane	GO:0008509//anion transmembrane transporter activity;GO:0015291//secondary active transmembrane transporter activity	GO:0015698//inorganic anion transport	gi|397522257|ref|XP_003831193.1|/0/1
376497	3562	468.51	221.96	13.63	6.29	-1.11565	Down	8.06608e-23	3.20182e-21	SLC27A1	solute carrier family 27 (fatty acid transporter), member 1	K08745	GO:0019866//organelle inner membrane;GO:0031224//intrinsic to membrane;GO:0042598;GO:0043231//intracellular membrane-bounded organelle;GO:0044459//plasma membrane part	GO:0005319//lipid transporter activity;GO:0015645//fatty acid ligase activity;GO:0042802//identical protein binding	GO:0006655//phosphatidylglycerol biosynthetic process;GO:0006658//phosphatidylserine metabolic process;GO:0006950//response to stress;GO:0015908//fatty acid transport;GO:0031649//heat generation;GO:0032787//monocarboxylic acid metabolic process;GO:0043434//response to peptide hormone stimulus;GO:0046335//ethanolamine biosynthetic process;GO:0046394;GO:0046470//phosphatidylcholine metabolic process	gi|38524616|ref|NP_940982.1|/0/1
4602	3360.72	175	84	5.47	2.53	-1.1124	Down	3.5792e-09	5.54607e-08	MYB	v-myb myeloblastosis viral oncogene homolog (avian)	K09420	GO:0034399//nuclear periphery;GO:0043231//intracellular membrane-bounded organelle	GO:0003676//nucleic acid binding;GO:0016564//transcription repressor activity	GO:0000122//negative regulation of transcription from RNA polymerase II promoter;GO:0007599//hemostasis;GO:0010551	gi|45502029|emb|CAE82649.1|/0/1
2196	14565	1851	881	13.04	6.05	-1.10794	Down	6.65678e-84	1.01047e-81	FAT2	FAT tumor suppressor homolog 2 (Drosophila)	K06813	GO:0005911//cell-cell junction;GO:0031224//intrinsic to membrane;GO:0043231//intracellular membrane-bounded organelle	GO:0046872//metal ion binding	GO:0001667//ameboidal cell migration;GO:0016337//cell-cell adhesion	gi|13787217|ref|NP_001438.1|/0/1
8644	1250.72	2025.1	967.65	171.92	80	-1.10367	Down	5.43782e-91	9.68996e-89	AKR1C3	aldo-keto reductase family 1, member C3	K00100;K05295;K00092;K00037;K00089;K04119;K00212	GO:0044424//intracellular part	GO:0016628//oxidoreductase activity, acting on the CH-CH group of donors, NAD or NADP as acceptor;GO:0047023//androsterone dehydrogenase activity	GO:0006692	gi|40788950|dbj|BAA04619.2|/0/1
84706	3963	539	259	14.07	6.59	-1.09427	Down	3.68936e-25	1.60433e-23	GPT2	glutamic pyruvate transaminase (alanine aminotransferase) 2	K00814	GO:0044429//mitochondrial part	GO:0047635;GO:0048037//cofactor binding	GO:0006522//alanine metabolic process;GO:0043648//dicarboxylic acid metabolic process	gi|402908277|ref|XP_003916878.1|/0/1
8864	6342	337.13	162.24	5.48	2.57	-1.09241	Down	2.6896e-16	7.65509e-15	PER2	period circadian clock 2	K02633	GO:0043231//intracellular membrane-bounded organelle	GO:0005488//binding;GO:0060089	GO:0000122//negative regulation of transcription from RNA polymerase II promoter;GO:0048511//rhythmic process	gi|6683645|dbj|BAA20804.2|/0/1
115704	3834	137	66	3.7	1.74	-1.08844	Down	2.00266e-07	2.49291e-06	EVI5L	ecotropic viral integration site 5-like	K10352;K10362;K11837;K06102	GO:0044464//cell part	GO:0005099//Ras GTPase activator activity;GO:0005488//binding	GO:0032318//regulation of Ras GTPase activity	gi|229577000|ref|NP_001153416.1|/0/1
94241	5628	79	38	1.44	0.68	-1.08246	Down	7.92766e-05	0.000610456	TP53INP1	tumor protein p53 inducible nuclear protein 1	K15310	GO:0016604//nuclear body	-	GO:0012502//induction of programmed cell death;GO:0022402//cell cycle process;GO:0050896//response to stimulus	gi|15150807|ref|NP_150601.1|/6.58425e-124/1
1646	3436.18	4963.69	2437.55	151.07	71.66	-1.07598	Down	2.33428e-207	1.15964e-204	AKR1C2	aldo-keto reductase family 1, member C2	K00100;K05295;K00092;K00037;K00089;K00212	GO:0044424//intracellular part;GO:0044444//cytoplasmic part	GO:0005496//steroid binding;GO:0016628//oxidoreductase activity, acting on the CH-CH group of donors, NAD or NADP as acceptor;GO:0047023//androsterone dehydrogenase activity	GO:0006692;GO:0008202//steroid metabolic process;GO:0015718//monocarboxylic acid transport;GO:0017085//response to insecticide;GO:0030301//cholesterol transport;GO:0032501//multicellular organismal process;GO:0051259//protein oligomerization;GO:0055092//sterol homeostasis	gi|4503285|ref|NP_001345.1|/0/1
80221	2257	240	117	11.1	5.27	-1.07468	Down	1.03637e-11	2.04455e-10	ACSF2	acyl-CoA synthetase family member 2	K00666	GO:0043231//intracellular membrane-bounded organelle	GO:0003824//catalytic activity;GO:0032559	GO:0032787//monocarboxylic acid metabolic process;GO:0044238//primary metabolic process	gi|156151445|ref|NP_079425.3|/0/1
80725	7050	135	66	1.97	0.94	-1.06746	Down	3.79524e-07	4.51518e-06	SRCIN1	SRC kinase signaling inhibitor 1	-	GO:0005624//membrane fraction;GO:0005924//cell-substrate adherens junction;GO:0031252//cell leading edge;GO:0043005//neuron projection;GO:0044297//cell body;GO:0044430//cytoskeletal part	GO:0019900//kinase binding	GO:0006469//negative regulation of protein kinase activity;GO:0007155//cell adhesion;GO:0016192//vesicle-mediated transport;GO:0016477//cell migration;GO:0045860//positive regulation of protein kinase activity;GO:0048523//negative regulation of cellular process;GO:0048814//regulation of dendrite morphogenesis	gi|115334682|ref|NP_079524.2|/0/1
57502	5672	198	97	3.6	1.72	-1.06559	Down	8.13142e-10	1.33574e-08	NLGN4X	neuroligin 4, X-linked	K07378	GO:0016021//integral to membrane;GO:0043005//neuron projection	GO:0042802//identical protein binding;GO:0043168	GO:0002118//aggressive behavior;GO:0007619//courtship behavior;GO:0022037//metencephalon development;GO:0034330;GO:0043062//extracellular structure organization;GO:0045927//positive regulation of growth;GO:0051899//membrane depolarization	gi|6330941|dbj|BAA86574.1|/0/1
1960	4163.28	165	82	4.15	1.99	-1.06034	Down	3.46786e-08	4.76547e-07	EGR3	early growth response 3	K12497	GO:0043231//intracellular membrane-bounded organelle	GO:0001071//nucleic acid binding transcription factor activity;GO:0003676//nucleic acid binding;GO:0046914//transition metal ion binding	GO:0007268//synaptic transmission;GO:0007399//nervous system development;GO:0010467//gene expression;GO:0048511//rhythmic process;GO:0048513//organ development	gi|315467854|ref|NP_001186809.1|/0/1
79192	1858	280	138	15.81	7.59	-1.05867	Down	3.88004e-13	8.64258e-12	IRX1	iroquois homeobox 1	K15611;K15613	-	-	GO:0001822//kidney development	gi|426385199|ref|XP_004059114.1|/2.16254e-172/1
768	1561	158	78	10.67	5.13	-1.05653	Down	5.39506e-08	7.19078e-07	CA9	carbonic anhydrase IX	K01672	GO:0005902//microvillus;GO:0031224//intrinsic to membrane;GO:0031981//nuclear lumen;GO:0044459//plasma membrane part	GO:0016836//hydro-lyase activity;GO:0046914//transition metal ion binding	GO:0006810//transport;GO:0006950//response to stress;GO:0044237//cellular metabolic process;GO:0048545//response to steroid hormone stimulus;GO:0048729//tissue morphogenesis	gi|169636420|ref|NP_001207.2|/0/1
6275	516.67	169	84	36.88	17.74	-1.05583	Down	2.37968e-08	3.33155e-07	S100A4	S100 calcium binding protein A4	K10384;K14734	GO:0042995//cell projection;GO:0043231//intracellular membrane-bounded organelle;GO:0044444//cytoplasmic part	GO:0005102//receptor binding;GO:0046872//metal ion binding	GO:0000904//cell morphogenesis involved in differentiation;GO:0007249//I-kappaB kinase/NF-kappaB cascade	gi|397492612|ref|XP_003817215.1|/1.6106e-54/1
64061	2833	302	149	11.08	5.33	-1.05575	Down	5.02222e-14	1.20196e-12	TSPYL2	TSPY-like 2	K11285	GO:0031981//nuclear lumen	GO:0005488//binding	GO:0001932//regulation of protein phosphorylation;GO:0006260//DNA replication;GO:0016049//cell growth	gi|11545835|ref|NP_071400.1|/0/1
828	1606.07	865	429	56.94	27.4	-1.05527	Down	7.44798e-37	4.84532e-35	CAPS	calcyphosine	K12042;K02183;K14684	GO:0044424//intracellular part	GO:0046872//metal ion binding	GO:0007165//signal transduction	gi|119589534|gb|EAW69128.1|/1.1913e-117/1
124935	3024	360	178	12.36	5.96	-1.05229	Down	2.31426e-16	6.60975e-15	SLC43A2	solute carrier family 43, member 2	K08229	GO:0031224//intrinsic to membrane	GO:0015171//amino acid transmembrane transporter activity	GO:0006807//nitrogen compound metabolic process;GO:0006865//amino acid transport	gi|22748751|ref|NP_689559.1|/0/1
4837	1579	1739	862	116.03	56.02	-1.05048	Down	2.08146e-72	2.75189e-70	NNMT	nicotinamide N-methyltransferase	K00541	GO:0044444//cytoplasmic part	GO:0008170//N-methyltransferase activity;GO:0008757//S-adenosylmethionine-dependent methyltransferase activity	GO:0006730//one-carbon metabolic process	gi|5453790|ref|NP_006160.1|/4.23065e-150/1
124975	2555.89	171.08	85.24	7	3.38	-1.05033	Down	1.97146e-08	2.78142e-07	GGT6	gamma-glutamyltransferase 6	K00681	-	GO:0016740//transferase activity	-	gi|38970000|gb|AAH63111.1|/4.58777e-166/1
92	5244	127	63	2.5	1.21	-1.04692	Down	1.25939e-06	1.37919e-05	ACVR2A	activin A receptor, type IIA	K04670	GO:0016021//integral to membrane;GO:0043235//receptor complex;GO:0044424//intracellular part	GO:0017002//activin-activated receptor activity;GO:0032403//protein complex binding;GO:0032559;GO:0034711//inhibin binding;GO:0043169//cation binding	GO:0001501//skeletal system development;GO:0001932//regulation of protein phosphorylation;GO:0003002//regionalization;GO:0007320//insemination;GO:0007369//gastrulation;GO:0008283//cell proliferation;GO:0008406//gonad development;GO:0009855//determination of bilateral symmetry;GO:0030282//bone mineralization;GO:0030509//BMP signaling pathway;GO:0032278;GO:0032768;GO:0032924//activin receptor signa…	gi|281353901|gb|EFB29485.1|/0/1
3613	1537	680	338	46.65	22.58	-1.04683	Down	3.45278e-29	1.74169e-27	IMPA2	inositol(myo)-1(or 4)-monophosphatase 2	K01092	GO:0044424//intracellular part	GO:0004437//inositol or phosphatidylinositol phosphatase activity;GO:0042802//identical protein binding;GO:0043169//cation binding	GO:0019751//polyol metabolic process;GO:0023052//signaling;GO:0046838//phosphorylated carbohydrate dephosphorylation	gi|112490221|pdb|2CZH|A/2.45626e-163/1
58473	2027	219	109	11.31	5.48	-1.04535	Down	2.18766e-10	3.78717e-09	PLEKHB1	pleckstrin homology domain containing, family B (evectins) member 1	-	GO:0012505//endomembrane system;GO:0031224//intrinsic to membrane;GO:0031513//nonmotile primary cilium;GO:0044424//intracellular part	GO:0042802//identical protein binding;GO:0060089	GO:0007165//signal transduction;GO:0032501//multicellular organismal process	gi|62089012|dbj|BAD92953.1|/3.02956e-104/1
84000	2337.06	67	29	2.6	1.26	-1.04509	Down	5.5905e-05	0.000445772	TMPRSS13	transmembrane protease, serine 13	K09643	GO:0031224//intrinsic to membrane	GO:0004175//endopeptidase activity	GO:0019538//protein metabolic process	gi|350529377|ref|NP_001231924.1|/0/1
5327	3165.39	1232	617	40.46	19.71	-1.03757	Down	1.15251e-50	1.06148e-48	PLAT	plasminogen activator, tissue	K01343	GO:0016023//cytoplasmic membrane-bounded vesicle;GO:0044421//extracellular region part	GO:0004175//endopeptidase activity;GO:0005488//binding	GO:0007169//transmembrane receptor protein tyrosine kinase signaling pathway;GO:0014812//muscle cell migration;GO:0030162//regulation of proteolysis;GO:0030195//negative regulation of blood coagulation;GO:0043412//macromolecule modification	gi|4505861|ref|NP_000921.1|/0/1
140467	2003	144	72	7.53	3.67	-1.03687	Down	3.12262e-07	3.77802e-06	ZNF358	zinc finger protein 358	K09230	GO:0005622//intracellular	GO:0046872//metal ion binding	GO:0007399//nervous system development;GO:0030326//embryonic limb morphogenesis	gi|119589442|gb|EAW69036.1|/0/1
6720	4934.16	6063	3033	126.63	61.85	-1.03377	Down	1.44814e-242	9.1311e-240	SREBF1	sterol regulatory element binding transcription factor 1	K07197	GO:0012505//endomembrane system;GO:0030134//ER to Golgi transport vesicle;GO:0031090//organelle membrane;GO:0031224//intrinsic to membrane	GO:0001071//nucleic acid binding transcription factor activity;GO:0010843;GO:0030528//transcription regulator activity	GO:0006357//regulation of transcription from RNA polymerase II promoter;GO:0016125//sterol metabolic process;GO:0031669//cellular response to nutrient levels	gi|52630419|ref|NP_001005291.1|/0/1
84218	2122	178.14	89.58	8.78	4.3	-1.02988	Down	1.26548e-08	1.8474e-07	TBC1D3F	TBC1 domain family, member 3F	K08395;K11837	GO:0044464//cell part	GO:0005099//Ras GTPase activator activity	GO:0032318//regulation of Ras GTPase activity	gi|256220345|ref|NP_115634.2|/0/1
10501	3961	185	93	4.83	2.37	-1.02714	Down	8.1109e-09	1.20992e-07	SEMA6B	sema domain, transmembrane domain (TM), and cytoplasmic domain, (semaphorin) 6B	K06842	GO:0031224//intrinsic to membrane	GO:0004871//signal transducer activity;GO:0005102//receptor binding	GO:0023052//signaling;GO:0048731;GO:0048869//cellular developmental process	gi|19718780|ref|NP_115484.2|/0/1
56606	1874	103	52	5.76	2.83	-1.02527	Down	1.91568e-05	0.000169669	SLC2A9	solute carrier family 2 (facilitated glucose transporter), member 9	K08146	GO:0031224//intrinsic to membrane	GO:0005402//cation:sugar symporter activity	GO:0006082//organic acid metabolic process;GO:0008645//hexose transport	gi|426343814|ref|XP_004038481.1|/0/1
9145	1738.66	92	46	5.49	2.71	-1.01851	Down	4.44104e-05	0.000363668	SYNGR1	synaptogyrin 1	K04403;K1	GO:0008021//synaptic vesicle;GO:0016021//integral to membrane;GO:0044459//plasma membrane part;GO:0048770	-	GO:0006886//intracellular protein transport;GO:0048168//regulation of neuronal synaptic plasticity	gi|22035700|ref|NP_663791.1|/7.91294e-88/1
4684	5998.17	186	95	3.22	1.59	-1.01803	Down	1.38392e-08	2.00956e-07	NCAM1	neural cell adhesion molecule 1	K06491	GO:0009986//cell surface;GO:0012505//endomembrane system;GO:0031224//intrinsic to membrane;GO:0043005//neuron projection;GO:0044297//cell body	-	GO:0006935//chemotaxis;GO:0009967//positive regulation of signal transduction;GO:0016337//cell-cell adhesion;GO:0019221//cytokine-mediated signaling pathway	gi|94420689|ref|NP_000606.3|/0/1
2353	2158	4334	2198	209.89	103.71	-1.01708	Down	1.31786e-168	4.69672e-166	FOS	FBJ murine osteosarcoma viral oncogene homolog	K04379	GO:0005624//membrane fraction;GO:0031981//nuclear lumen;GO:0043234//protein complex	GO:0001071//nucleic acid binding transcription factor activity;GO:0003702//RNA polymerase II transcription factor activity;GO:0043565//sequence-specific DNA binding;GO:0043566//structure-specific DNA binding;GO:0046332//SMAD binding;GO:0046983//protein dimerization activity	GO:0000165//MAPK cascade;GO:0000302//response to reactive oxygen species;GO:0002224//toll-like receptor signaling pathway;GO:0002237//response to molecule of bacterial origin;GO:0006305;GO:0006357//regulation of transcription from RNA polymerase II promoter;GO:0007154//cell communication;GO:0007178//transmembrane receptor protein serine/threonine kinase signaling pathway;GO:0007631//feeding behav…	gi|4885241|ref|NP_005243.1|/2.5992e-172/1
23046	9339	86	44	0.95	0.47	-1.01527	Down	0.000121777	0.000900099	KIF21B	kinesin family member 21B	K10395	GO:0015630//microtubule cytoskeleton	GO:0003774//motor activity;GO:0032559	GO:0007017//microtubule-based process	gi|71891657|dbj|BAA32294.2|/0/1
149076	3158	270	137	8.87	4.39	-1.01471	Down	5.37776e-12	1.08575e-10	ZNF362	zinc finger protein 362	K09228	GO:0043231//intracellular membrane-bounded organelle	GO:0003676//nucleic acid binding;GO:0046914//transition metal ion binding	-	gi|38570115|ref|NP_689706.2|/0/1
379	1602	102	52	6.71	3.33	-1.01079	Down	2.60796e-05	0.000223613	ARL4D	ADP-ribosylation factor-like 4D	K07948	GO:0016020//membrane;GO:0031981//nuclear lumen	GO:0017111//nucleoside-triphosphatase activity;GO:0032561//guanyl ribonucleotide binding	GO:0009207;GO:0015031//protein transport;GO:0035556//intracellular signal transduction	gi|41327767|ref|NP_001652.2|/6.92985e-100/1
84879	2197	1032	526	49.06	24.37	-1.00944	Down	4.43754e-41	3.27698e-39	MFSD2A	major facilitator superfamily domain containing 2A	K08824	GO:0031090//organelle membrane;GO:0031224//intrinsic to membrane;GO:0043231//intracellular membrane-bounded organelle	-	GO:0006810//transport	gi|42713696|ref|NP_116182.2|/0/1
64218	3084.55	104	50	3.3	1.64	-1.00877	Down	5.73806e-06	5.56955e-05	SEMA4A	sema domain, immunoglobulin domain (Ig), transmembrane domain (TM) and short cytoplasmic domain, (semaphorin) 4A	K06521	GO:0031224//intrinsic to membrane	GO:0004871//signal transducer activity	GO:0006935//chemotaxis;GO:0048731;GO:0048869//cellular developmental process;GO:0050953//sensory perception of light stimulus	gi|21361914|ref|NP_071762.2|/0/1
135112	5103.99	1295	734	29.05	14.47	-1.00547	Down	3.54476e-39	2.47288e-37	NCOA7	nuclear receptor coactivator 7	K11447;K00939;K00591;K12587	GO:0043231//intracellular membrane-bounded organelle	GO:0004871//signal transducer activity;GO:0005488//binding	GO:0009056//catabolic process;GO:0010467//gene expression;GO:0023052//signaling	gi|313850981|ref|NP_001186551.1|/2.67947e-115/1
3164	2547.34	463	236	18.87	9.4	-1.00536	Down	2.55764e-19	8.4707e-18	NR4A1	nuclear receptor subfamily 4, group A, member 1	K04465	GO:0031981//nuclear lumen	GO:0001071//nucleic acid binding transcription factor activity;GO:0003677//DNA binding;GO:0004879//ligand-activated sequence-specific DNA binding RNA polymerase II transcription factor activity;GO:0030528//transcription regulator activity;GO:0042802//identical protein binding;GO:0046914//transition metal ion binding;GO:0046983//protein dimerization activity	GO:0007169//transmembrane receptor protein tyrosine kinase signaling pathway;GO:0010466//negative regulation of peptidase activity;GO:0010551;GO:0012502//induction of programmed cell death;GO:0048017//inositol lipid-mediated signaling	gi|119578627|gb|EAW58223.1|/0/1
341640	16179	443.29	225.93	2.81	1.4	-1.00514	Down	1.07701e-18	3.46205e-17	FREM2	FRAS1 related extracellular matrix protein 2	K08115	GO:0005578//proteinaceous extracellular matrix;GO:0031224//intrinsic to membrane	GO:0046872//metal ion binding	GO:0016337//cell-cell adhesion;GO:0032501//multicellular organismal process;GO:0048729//tissue morphogenesis	gi|119629013|gb|EAX08608.1|/0/1
10129	10718	104	54	1	0.5	-1	Down	3.26358e-05	0.000274657	FRY	furry homolog (Drosophila)	-	GO:0031224//intrinsic to membrane	-	-	gi|117606355|ref|NP_075463.2|/0/1
